# Supplementary material for: Transcriptome analysis reveals manifold mechanisms of cyst development in ADPKD
Source: Springer Nature journal article supplement (doi:10.1186/s40246-016-0095-x), 2016-11-21
Supplement: 40246_2016_95_MOESM1_ESM.pdf [file 40246_2016_95_MOESM1_ESM.pdf]

**Significantly Changed Genes NC-ADPKD vs. NK**

| Protein         | Gene symbol | Position | Relative position | Fold change  | P value     |
|-----------------|-------------|----------|-------------------|--------------|-------------|
| ensp00000319814 | pck1        | 3713     | 0.383415944       | 5.583712739  | 1.54E-08    |
| ensp00000314151 | klk3        | 5384     | 0.555968608       | -12.17241192 | 3.70E-05    |
| ensp00000231751 | ltf         | 5437     | 0.561441553       | 4.50460022   | 8.44E-05    |
| ensp00000358525 | ngf         | 4433     | 0.457765386       | 2.005692753  | 9.80E-05    |
| ensp00000296871 | csf2        | 4562     | 0.471086328       | 3.821352941  | 0.000214939 |
| ensp00000317145 | gdnf        | 4764     | 0.491945477       | 2.647404444  | 0.000302276 |
| ensp00000352064 | klrc1       | 5982     | 0.61771995        | 5.273866972  | 0.000325934 |
| ensp00000296140 | ccr1        | 4050     | 0.418215613       | -2.889418535 | 0.000710883 |
| ensp00000378359 | adh6        | 7781     | 0.803490293       | -5.081081081 | 0.000790539 |
| ensp00000318867 | cyp8b1      | 7824     | 0.807930607       | -2.797832169 | 0.00127787  |
| ensp00000236147 | sell        | 6977     | 0.720466749       | 3.044065439  | 0.00157787  |
| ensp00000268933 | epn3        | 4975     | 0.513733994       | -3.220280846 | 0.00166315  |
| ensp00000355378 | plxnb3      | 6236     | 0.643948781       | 2.084190722  | 0.00173232  |
| ensp00000263413 | c6          | 2525     | 0.260739364       | 7.363227517  | 0.00177939  |
| ensp00000005180 | ccl26       | 4080     | 0.421313507       | 2.413398183  | 0.0018296   |
| ensp00000265440 | tfec        | 2702     | 0.279016935       | -2.004648614 | 0.00305922  |
| ensp00000242338 | cntfr       | 4628     | 0.477901694       | -3.379596658 | 0.0034224   |
| ensp00000329210 | or2t10      | 9592     | 0.990499793       | -3.053191489 | 0.0038099   |
| ensp00000265643 | gal         | 4036     | 0.41676993        | 2.804490385  | 0.00453194  |
| ensp00000305355 | prkcb       | 5216     | 0.538620405       | -3.297926156 | 0.00478743  |
| ensp00000269346 | ttyh2       | 390      | 0.040272615       | -3.623704318 | 0.00516668  |
| ensp00000351671 | ccl20       | 4060     | 0.419248245       | 3.235491082  | 0.00536753  |
| ensp00000244709 | trem1       | 8754     | 0.903965304       | 7.405157409  | 0.00566153  |
| ensp00000287641 | sst         | 3946     | 0.407476249       | 3.423913043  | 0.00606264  |
| ensp00000288490 | dgki        | 7200     | 0.743494424       | 3.658469718  | 0.00684863  |
| ensp00000222482 | cpa4        | 24       | 0.002478315       | 2.332882246  | 0.00742684  |
| ensp00000312326 | aoc3        | 7885     | 0.814229657       | 3.410155335  | 0.00805939  |
| ensp00000339398 | hla-dqa1    | 5722     | 0.590871541       | 2.276194685  | 0.00885913  |
| ensp00000414360 | hla-dqa1    | 6523     | 0.673585295       | 2.276194685  | 0.00885913  |
| ensp00000387892 | hla-dqa1    | 8745     | 0.903035936       | 2.276194685  | 0.00885913  |
| ensp00000409127 | hla-dqa1    | 8746     | 0.903139199       | 2.276194685  | 0.00885913  |
| ensp00000372738 | hla-dqa1    | 8885     | 0.917492772       | 2.276194685  | 0.00885913  |
| ensp00000287713 | nmnat2      | 2775     | 0.286555143       | 3.46         | 0.00905935  |
| ensp00000364430 | sp5         | 3459     | 0.357187113       | 2.751449277  | 0.00995578  |

**Significantly Changed Genes C-ADPKD vs. NK**

| Protein         | Gene symbol | Position | Relative position | Fold change | P value  |
|-----------------|-------------|----------|-------------------|-------------|----------|
| ensp00000303153 | col22a1     | 5701     | 0.588703015       | 14.96810103 | 1.49E-10 |
| ensp00000064724 | cldn11      | 6940     | 0.716646014       | 46.73731658 | 3.97E-10 |
| ensp00000377265 | tfap2b      | 334      | 0.03448988        | 22.32258065 | 1.59E-09 |
| ensp00000420295 | pde6b       | 2724     | 0.281288724       | 20.58120513 | 2.36E-09 |
| ensp00000270279 | cbic        | 4731     | 0.488537794       | 17.0283617  | 8.79E-09 |
| ensp00000297268 | col1a2      | 5661     | 0.584572491       | 8.954545455 | 9.88E-09 |
| ensp00000363298 | bspry       | 7345     | 0.758467575       | 29.10415625 | 2.29E-08 |

|                 |            |      |             |              |          |
|-----------------|------------|------|-------------|--------------|----------|
| ensp00000332643 | ndn        | 3762 | 0.388475836 | 38.32463854  | 2.98E-08 |
| ensp00000284440 | uchl1      | 3180 | 0.328376704 | 5.007540453  | 3.59E-08 |
| ensp00000220772 | sfrp1      | 3693 | 0.381350682 | 28.04589729  | 4.19E-08 |
| ensp00000351206 | txlnb      | 7377 | 0.761771995 | 24.56        | 6.23E-08 |
| ensp00000291009 | pip        | 9186 | 0.948574969 | 19.4999801   | 1.93E-07 |
| ensp00000354376 | rab25      | 7494 | 0.773853779 | 30.14443333  | 3.60E-07 |
| ensp00000260197 | sorl1      | 8269 | 0.853882693 | 18.9327572   | 5.26E-07 |
| ensp00000306099 | fgb        | 5420 | 0.55968608  | -2.5778947   | 6.46E-07 |
| ensp00000368727 | xdh        | 7662 | 0.791201983 | 2.361702128  | 7.66E-07 |
| ensp00000296026 | cxcl3      | 3978 | 0.410780669 | 2.197457478  | 7.83E-07 |
| ensp00000309757 | lpl        | 5103 | 0.526951673 | 15.17477201  | 8.16E-07 |
| ensp00000255192 | bhmt2      | 7900 | 0.815778604 | 20.72387259  | 8.42E-07 |
| ensp00000156626 | st6galnac1 | 9320 | 0.962412226 | 17.15466717  | 8.63E-07 |
| ensp00000259455 | gabbr2     | 4239 | 0.437732342 | 39.11545984  | 9.32E-07 |
| ensp00000296849 | nkd2       | 3549 | 0.366480793 | -2.766307199 | 9.45E-07 |
| ensp00000262262 | cd33       | 8714 | 0.899834779 | -22.43399286 | 1.01E-06 |
| ensp00000330658 | pappa      | 5744 | 0.593143329 | 3.403507519  | 1.04E-06 |
| ensp00000279441 | mmp10      | 5504 | 0.568360182 | 16.341675    | 1.08E-06 |
| ensp00000340200 | glyat      | 9084 | 0.938042131 | -7.468387931 | 1.15E-06 |
| ensp00000244458 | pacsin1    | 5553 | 0.573420074 | -2.465950909 | 1.23E-06 |
| ensp00000327107 | pdzd3      | 532  | 0.054935977 | -4.927565661 | 1.29E-06 |
| ensp00000398028 | npr3       | 8551 | 0.883002891 | -2.699724518 | 1.38E-06 |
| ensp00000367462 | olah       | 7458 | 0.770136307 | 9.140350877  | 1.39E-06 |
| ensp00000299106 | jam3       | 5214 | 0.538413879 | 23.47543193  | 1.48E-06 |
| ensp00000309270 | chst1      | 9289 | 0.95921107  | -13.54070128 | 1.67E-06 |
| ensp00000258499 | usp44      | 520  | 0.053696819 | 18.84692975  | 1.83E-06 |
| ensp00000296435 | camp       | 603  | 0.062267658 | -14.70454545 | 1.91E-06 |
| ensp00000306361 | fga        | 5419 | 0.559582817 | -13.74192662 | 1.91E-06 |
| ensp00000355627 | agt        | 8848 | 0.913672036 | -2.069642448 | 2.00E-06 |
| ensp00000229030 | fzd10      | 3730 | 0.385171417 | 20.64635445  | 2.14E-06 |
| ensp00000321853 | serpinf2   | 5259 | 0.543060719 | -3.475370806 | 2.33E-06 |
| ensp00000263341 | il1b       | 4389 | 0.453221809 | 2.153845275  | 2.68E-06 |
| ensp00000372160 | dok6       | 4726 | 0.488021479 | 11.29884483  | 2.89E-06 |
| ensp00000261254 | ccnd2      | 2763 | 0.285315985 | 2.156579998  | 3.01E-06 |
| ensp00000369071 | postn      | 7251 | 0.748760843 | 28.15475     | 3.31E-06 |
| ensp00000355920 | slc22a2    | 6993 | 0.722118959 | 11.50000079  | 3.60E-06 |
| ensp00000306884 | cxcl11     | 4087 | 0.422036349 | 10.19492389  | 3.66E-06 |
| ensp00000260795 | fgfr3      | 4877 | 0.503614209 | -2.836495762 | 3.81E-06 |
| ensp00000410294 | fgfr2      | 4791 | 0.494733581 | -3.046526502 | 4.15E-06 |
| ensp00000417583 | st6galnac5 | 9234 | 0.953531599 | 11.95276532  | 4.74E-06 |
| ensp00000261195 | gys2       | 3635 | 0.375361421 | -2.009956008 | 5.21E-06 |
| ensp00000371372 | atp12a     | 8656 | 0.893845518 | 14.38774042  | 5.57E-06 |
| ensp00000294339 | tal1       | 3153 | 0.3255886   | 5.032721806  | 5.85E-06 |
| ensp00000302648 | nrtm       | 6002 | 0.619785213 | -4.76539378  | 6.21E-06 |
| ensp00000216274 | ripk3      | 4326 | 0.446716233 | 10.72331959  | 6.23E-06 |
| ensp00000355556 | gng4       | 4194 | 0.433085502 | 2.280995163  | 6.46E-06 |
| ensp00000327453 | acsm2b     | 8508 | 0.878562577 | -3.045171811 | 8.63E-06 |

|                 |          |      |             |              |          |
|-----------------|----------|------|-------------|--------------|----------|
| ensp00000365301 | fgf14    | 5029 | 0.519310202 | -2.042141398 | 8.79E-06 |
| ensp00000282111 | tcf7l1   | 3411 | 0.352230483 | 11.79311158  | 9.23E-06 |
| ensp00000320935 | slc2a4   | 3712 | 0.383312681 | -9.563322953 | 9.90E-06 |
| ensp00000263182 | bbox1    | 8124 | 0.838909542 | -12.59481673 | 9.91E-06 |
| ensp00000354677 | gpx7     | 6651 | 0.686802974 | 7.051725155  | 1.02E-05 |
| ensp00000226524 | pf4v1    | 3952 | 0.408095828 | 12.05982051  | 1.03E-05 |
| ensp00000414330 | rimkla   | 6440 | 0.665014457 | 11.74011864  | 1.07E-05 |
| ensp00000288221 | erc2     | 7029 | 0.725836431 | 2.736919283  | 1.09E-05 |
| ensp00000362171 | nap1l3   | 26   | 0.002684841 | 8.342867624  | 1.13E-05 |
| ensp00000260404 | pak6     | 4735 | 0.488950847 | 8.262298468  | 1.15E-05 |
| ensp00000359074 | l1cam    | 5446 | 0.562370921 | 18.02610263  | 1.17E-05 |
| ensp00000316328 | ciita    | 5324 | 0.549772821 | -10.93374153 | 1.31E-05 |
| ensp00000379310 | casc1    | 1584 | 0.163568773 | -2.523678254 | 1.33E-05 |
| ensp00000312987 | hnf4a    | 3291 | 0.33983891  | -5.543046122 | 1.33E-05 |
| ensp00000368632 | gata3    | 3232 | 0.333746386 | 19.50494108  | 1.43E-05 |
| ensp00000383558 | gcgr     | 4125 | 0.425960347 | 17.08108108  | 1.59E-05 |
| ensp00000309572 | tert     | 2947 | 0.304316398 | -2.478050696 | 1.93E-05 |
| ensp00000301242 | ppp1r14a | 3676 | 0.379595209 | 2.167777825  | 1.96E-05 |
| ensp00000330959 | il1r2    | 4391 | 0.453428335 | -2.00395962  | 2.10E-05 |
| ensp00000348170 | hp       | 8651 | 0.893329203 | -2.368095232 | 2.12E-05 |
| ensp00000282728 | hhex     | 9383 | 0.968917803 | 12.70422726  | 2.35E-05 |
| ensp00000304930 | sostdc1  | 5873 | 0.606464271 | -5.391145901 | 2.38E-05 |
| ensp00000371471 | rsad2    | 5347 | 0.552147873 | 24.71424063  | 2.62E-05 |
| ensp00000359478 | abcc2    | 411  | 0.04244114  | -2.303585235 | 2.66E-05 |
| ensp00000295550 | col6a3   | 5688 | 0.587360595 | 16.51404819  | 2.84E-05 |
| ensp00000264708 | pomc     | 3865 | 0.399111937 | 11.83694366  | 2.94E-05 |
| ensp00000172229 | ngfr     | 4432 | 0.457662123 | -8.698853012 | 3.09E-05 |
| ensp00000381876 | daam2    | 3597 | 0.371437423 | -2.658357341 | 3.10E-05 |
| ensp00000364898 | syk      | 4836 | 0.499380421 | 21.21426407  | 3.10E-05 |
| ensp00000350928 | gad1     | 7909 | 0.816707972 | 15.57260127  | 3.71E-05 |
| ensp00000258743 | il6      | 4470 | 0.461586121 | 2.033492823  | 3.86E-05 |
| ensp00000264260 | il18rap  | 4285 | 0.442482445 | -15.54783961 | 4.05E-05 |
| ensp00000265944 | myo3a    | 6056 | 0.625361421 | 3.104516949  | 4.20E-05 |
| ensp00000259365 | tmod1    | 5808 | 0.599752169 | 7.140842556  | 4.30E-05 |
| ensp00000261233 | irak3    | 4345 | 0.448678232 | 11.61269128  | 4.42E-05 |
| ensp00000220809 | plat     | 5318 | 0.549153242 | 2.534677716  | 4.53E-05 |
| ensp00000351190 | itih2    | 6867 | 0.709107807 | -9.540117401 | 4.72E-05 |
| ensp00000226317 | cxcl6    | 4022 | 0.415324246 | 9.928033042  | 4.78E-05 |
| ensp00000310721 | cyp7b1   | 7843 | 0.809892606 | -2.151328221 | 4.87E-05 |
| ensp00000263621 | elane    | 5414 | 0.559066501 | -5.95044907  | 5.04E-05 |
| ensp00000284240 | thy1     | 5422 | 0.559892606 | 3.01515322   | 5.18E-05 |
| ensp00000222792 | chn2     | 7872 | 0.812887237 | 4.44528847   | 5.34E-05 |
| ensp00000265709 | ank1     | 6841 | 0.706422966 | 3.365934206  | 5.63E-05 |
| ensp00000263339 | il1a     | 4388 | 0.453118546 | 25.83333333  | 5.99E-05 |
| ensp00000394033 | kcnk2    | 9358 | 0.966336225 | -2.94778133  | 6.12E-05 |
| ensp00000335083 | ppp2r2c  | 3265 | 0.337154069 | 10.7452234   | 6.27E-05 |
| ensp00000255082 | acy3     | 7956 | 0.821561338 | -6.386378939 | 6.77E-05 |

|                 |          |      |             |              |             |
|-----------------|----------|------|-------------|--------------|-------------|
| ensp00000342445 | cldn4    | 6958 | 0.71850475  | 2.311060662  | 6.82E-05    |
| ensp00000254262 | c19orf40 | 2132 | 0.22015696  | -2.321802524 | 7.08E-05    |
| ensp00000327145 | flnc     | 5683 | 0.586844279 | 2.102519851  | 7.93E-05    |
| ensp00000360918 | ch25h    | 7817 | 0.807207765 | 15.7111      | 8.15E-05    |
| ensp00000351682 | cndp1    | 7968 | 0.822800496 | -9.748673662 | 8.22E-05    |
| ensp00000292513 | ptger1   | 4210 | 0.434737712 | 13.25263329  | 8.35E-05    |
| ensp00000275815 | epha1    | 4813 | 0.49700537  | 8.28358209   | 8.42E-05    |
| ensp00000415941 | c4b      | 6462 | 0.667286245 | -2.135488051 | 8.57E-05    |
| ensp00000364321 | c4b      | 7453 | 0.769619992 | -2.135488051 | 8.57E-05    |
| ensp00000410321 | ly6g5c   | 6509 | 0.672139612 | -2.583778941 | 8.69E-05    |
| ensp00000289422 | nrg2     | 4649 | 0.480070219 | 6.826096101  | 8.70E-05    |
| ensp00000344874 | gucy1a2  | 2353 | 0.242978108 | -2.188732882 | 9.71E-05    |
| ensp00000347379 | ocln     | 6965 | 0.719227592 | 6.336273128  | 9.76E-05    |
| ensp00000330074 | hist1h1b | 2012 | 0.207765386 | 18.91840596  | 9.78E-05    |
| ensp00000264563 | il11     | 6014 | 0.62102437  | 2.408425824  | 9.86E-05    |
| ensp00000410668 | tnf      | 4314 | 0.445477076 | 15           | 0.000100813 |
| ensp00000392858 | tnf      | 4353 | 0.449504337 | 15           | 0.000100813 |
| ensp00000398698 | tnf      | 4354 | 0.4496076   | 15           | 0.000100813 |
| ensp00000365290 | tnf      | 6348 | 0.65551425  | 15           | 0.000100813 |
| ensp00000283921 | hoxa10   | 137  | 0.014147047 | 9.976653706  | 0.000101158 |
| ensp00000264257 | il1rl2   | 8757 | 0.904275093 | 4.180453316  | 0.000102678 |
| ensp00000284818 | ly96     | 4418 | 0.456216439 | 2.16111      | 0.000103689 |
| ensp00000368966 | trpc3    | 5123 | 0.529016935 | -3.765552354 | 0.000105712 |
| ensp00000306157 | il7r     | 4596 | 0.474597274 | 7.666674419  | 0.000105783 |
| ensp00000308032 | cyp2s1   | 7800 | 0.805452292 | 6.402355954  | 0.000108339 |
| ensp00000228938 | mgp      | 5149 | 0.531701776 | 13.21152576  | 0.000109874 |
| ensp00000296280 | masp1    | 6971 | 0.719847171 | 2.343352668  | 0.000109957 |
| ensp00000343477 | runx3    | 3664 | 0.378356051 | -10.11904762 | 0.000110619 |
| ensp00000367830 | prkc2    | 4462 | 0.460760017 | 2.173560877  | 0.000110685 |
| ensp00000290341 | igf2bp1  | 1945 | 0.200846758 | 2.523163083  | 0.000112797 |
| ensp00000261205 | syt1     | 7079 | 0.730999587 | 11.88289189  | 0.000113513 |
| ensp00000367714 | hes5     | 3276 | 0.338289963 | 10.26597901  | 0.000115042 |
| ensp00000217407 | lbp      | 4368 | 0.451053284 | -3.325651766 | 0.000115942 |
| ensp00000254508 | nup210   | 1338 | 0.138166047 | 35.36842105  | 0.000116698 |
| ensp00000263080 | aspa     | 7957 | 0.821664601 | -10.79278378 | 0.000119527 |
| ensp00000320378 | slc7a8   | 8668 | 0.895084676 | 19.62789578  | 0.000121123 |
| ensp00000282356 | camk4    | 3626 | 0.374432053 | 6.20855947   | 0.000122135 |
| ensp00000306888 | fam151a  | 7592 | 0.783973565 | -6.399118421 | 0.000123373 |
| ensp00000357040 | vangl2   | 3540 | 0.365551425 | 25.09087651  | 0.000124046 |
| ensp00000338185 | plcb1    | 4457 | 0.460243701 | 8.916666667  | 0.00012471  |
| ensp00000364475 | fbp1     | 7280 | 0.751755473 | 14.99002499  | 0.000130016 |
| ensp00000355884 | mark1    | 2992 | 0.308963238 | 10.79103672  | 0.000130542 |
| ensp00000339292 | cldn14   | 6963 | 0.719021066 | 14.86486815  | 0.000138106 |
| ensp00000296140 | ccr1     | 4050 | 0.418215613 | -4.435429681 | 0.000140211 |
| ensp00000243213 | il13ra2  | 4592 | 0.474184221 | 29.98513431  | 0.00014043  |
| ensp00000296414 | dapp1    | 4797 | 0.49535316  | 10.9395298   | 0.000142421 |
| ensp00000342114 | icam4    | 5495 | 0.567430814 | 3.498495495  | 0.00014881  |

|                 |          |      |             |              |             |
|-----------------|----------|------|-------------|--------------|-------------|
| ensp00000337731 | cideb    | 4153 | 0.428851714 | -2.568388569 | 0.00015467  |
| ensp00000358301 | adrb1    | 3819 | 0.394361834 | 11.58930499  | 0.000159368 |
| ensp00000266085 | timp3    | 6030 | 0.62267658  | 21.15043261  | 0.00016184  |
| ensp00000167586 | krt14    | 3446 | 0.355844692 | 33.41993316  | 0.000162532 |
| ensp00000298841 | serpina4 | 9340 | 0.964477489 | -3.000003386 | 0.000163405 |
| ensp00000258873 | acsbg1   | 7424 | 0.766625361 | -4.70270588  | 0.000163564 |
| ensp00000342235 | erbb4    | 4694 | 0.484717059 | 14.9926      | 0.000172766 |
| ensp00000353362 | cacna1a  | 4242 | 0.438042131 | 19.8111      | 0.000188387 |
| ensp00000340396 | gbp5     | 6568 | 0.678232135 | 7.716490868  | 0.000191289 |
| ensp00000361943 | heyl     | 3216 | 0.332094176 | 11.25518018  | 0.000192667 |
| ensp00000272134 | lefty1   | 5813 | 0.600268484 | -5.32751761  | 0.000200717 |
| ensp00000356905 | vnn1     | 8380 | 0.865344899 | 11.61445783  | 0.000203037 |
| ensp00000228850 | akap3    | 8638 | 0.891986782 | 10.21593206  | 0.000206187 |
| ensp00000293272 | ccl5     | 4058 | 0.419041718 | 5.829622222  | 0.000208656 |
| ensp00000234371 | kiss1r   | 4274 | 0.441346551 | 4.619836934  | 0.00020948  |
| ensp00000354490 | atp1a2   | 9053 | 0.934840975 | -32.49017647 | 0.000217738 |
| ensp00000332052 | pcsk6    | 7440 | 0.768277571 | -6.497647887 | 0.000225379 |
| ensp00000359410 | ephx4    | 7459 | 0.77023957  | 2.004259799  | 0.000231058 |
| ensp00000173229 | ntn1     | 4856 | 0.501445684 | 21.72220833  | 0.000232817 |
| ensp00000297991 | aqp3     | 5333 | 0.550702189 | -3.356671851 | 0.000240107 |
| ensp00000378359 | adh6     | 7781 | 0.803490293 | -5.936835856 | 0.000245435 |
| ensp00000279804 | ctf1     | 6015 | 0.621127633 | 2.154882227  | 0.000248724 |
| ensp00000285018 | wnt7a    | 3757 | 0.387959521 | 18.36170213  | 0.000249232 |
| ensp00000356991 | pvr14    | 5595 | 0.577757125 | 7.569582524  | 0.000250749 |
| ensp00000296871 | csf2     | 4562 | 0.471086328 | 6.533771242  | 0.000252431 |
| ensp00000296027 | cxcl5    | 4061 | 0.419351508 | 2.500287271  | 0.000260221 |
| ensp00000350616 | ddc      | 7945 | 0.820425444 | -12.06565152 | 0.000261183 |
| ensp00000231751 | ltf      | 5437 | 0.561441553 | 3.688933896  | 0.000270783 |
| ensp00000225964 | col1a1   | 5662 | 0.584675754 | 15.35682143  | 0.000289198 |
| ensp00000253513 | ido1     | 7944 | 0.820322181 | 7.657572727  | 0.000299825 |
| ensp00000282641 | a1cf     | 103  | 0.010636101 | -6.079597015 | 0.000311038 |
| ensp00000307046 | sdc2     | 5650 | 0.583436596 | -2.888027243 | 0.000312413 |
| ensp00000337383 | nlrp3    | 2741 | 0.283044197 | 14.08917617  | 0.000314775 |
| ensp00000290399 | sim2     | 418  | 0.043163982 | 18.41665625  | 0.000322042 |
| ensp00000345512 | sema6a   | 6293 | 0.649834779 | 5.151829763  | 0.000329565 |
| ensp00000363157 | tnfsf15  | 6765 | 0.698574969 | 12.05299474  | 0.000337218 |
| ensp00000298472 | slc18a2  | 7030 | 0.725939694 | 15.239103    | 0.000345974 |
| ensp00000379895 | gatm     | 8049 | 0.831164808 | 2.57801126   | 0.00035331  |
| ensp00000307694 | kcns1    | 8449 | 0.872470054 | 8.969574536  | 0.000356517 |
| ensp00000308012 | pabpc5   | 258  | 0.026641884 | 23.43753662  | 0.000366896 |
| ensp00000344173 | grm8     | 8340 | 0.861214374 | 6.771611111  | 0.000371604 |
| ensp00000354416 | ccl28    | 3984 | 0.411400248 | 4.05166333   | 0.000383339 |
| ensp00000252729 | cacng6   | 5172 | 0.534076828 | 6.160533057  | 0.000385731 |
| ensp00000296641 | f2rl2    | 4414 | 0.455803387 | 12.03669912  | 0.000389644 |
| ensp00000361508 | pltp     | 7867 | 0.812370921 | 2.236915709  | 0.00039091  |
| ensp00000296370 | s100p    | 108  | 0.011152416 | 13.04348535  | 0.000391007 |
| ensp00000320886 | mixipl   | 6862 | 0.708591491 | -5.591463415 | 0.000391032 |

|                 |         |      |             |              |             |
|-----------------|---------|------|-------------|--------------|-------------|
| ensp00000409605 | trim15  | 6426 | 0.663568773 | -9.037300699 | 0.000394494 |
| ensp00000403221 | trim15  | 6770 | 0.699091285 | -9.037300699 | 0.000394494 |
| ensp00000297450 | angpt1  | 4717 | 0.487092111 | -4.061575454 | 0.000406823 |
| ensp00000308576 | rhod    | 5007 | 0.517038414 | 7.689050881  | 0.000407363 |
| ensp00000351671 | ccl20   | 4060 | 0.419248245 | 9.987128991  | 0.00040864  |
| ensp00000354207 | ntrk3   | 4738 | 0.489260636 | -3.211367816 | 0.000411597 |
| ensp00000340191 | fpr2    | 4131 | 0.426579926 | -4.893333333 | 0.000411854 |
| ensp00000264399 | prkg2   | 3674 | 0.379388682 | 2.27184466   | 0.000419689 |
| ensp00000263388 | notch3  | 3350 | 0.345931433 | 2.317444816  | 0.000426113 |
| ensp00000309148 | klk6    | 7438 | 0.768071045 | 4.192997118  | 0.00042891  |
| ensp00000346693 | elovl2  | 7559 | 0.780565882 | 3.787798079  | 0.000429405 |
| ensp00000287641 | sst     | 3946 | 0.407476249 | 12.5725      | 0.000433269 |
| ensp00000225275 | mpo     | 4624 | 0.477488641 | 3.37037037   | 0.000446471 |
| ensp00000253754 | pdlim4  | 6838 | 0.706113176 | 12.92025333  | 0.000446832 |
| ensp00000384264 | cnga1   | 3898 | 0.40251962  | 7.223459652  | 0.000462271 |
| ensp00000312021 | fut1    | 9240 | 0.954151177 | 2.694159794  | 0.000474401 |
| ensp00000338171 | skap1   | 6173 | 0.637443205 | 3.330409357  | 0.000474553 |
| ensp00000363985 | mtmr8   | 9114 | 0.941140025 | 4.137174397  | 0.000478122 |
| ensp00000250448 | foxa1   | 5483 | 0.566191656 | 9.674901235  | 0.000481448 |
| ensp00000201031 | tfap2c  | 335  | 0.034593143 | -2.872427984 | 0.000494946 |
| ensp00000270800 | il22ra1 | 4621 | 0.477178852 | -2.812717645 | 0.000498527 |
| ensp00000416387 | fblim1  | 5545 | 0.572593969 | 4.240440681  | 0.000522337 |
| ensp00000318867 | cyp8b1  | 7824 | 0.807930607 | -6.566329881 | 0.000529853 |
| ensp00000358042 | qrs1    | 68   | 0.007021892 | -2.606190065 | 0.000541189 |
| ensp00000255266 | pde6a   | 2725 | 0.281391987 | -9.937875815 | 0.000553976 |
| ensp00000291539 | pde9a   | 2744 | 0.283353986 | 11.67157353  | 0.000557508 |
| ensp00000278927 | esam    | 6976 | 0.720363486 | 4.07246087   | 0.000564559 |
| ensp00000277480 | lcn2    | 7529 | 0.777467988 | 2.038852459  | 0.000573697 |
| ensp00000367059 | espn    | 6547 | 0.67606361  | -2.370971218 | 0.00058212  |
| ensp00000242338 | cntfr   | 4628 | 0.477901694 | -4.909469136 | 0.000584223 |
| ensp00000244709 | trem1   | 8754 | 0.903965304 | 11.31032646  | 0.000585961 |
| ensp00000396774 | muc20   | 9268 | 0.957042544 | 4.094853659  | 0.000604168 |
| ensp00000304767 | p2ry1   | 4253 | 0.439178026 | -4.400560965 | 0.00061902  |
| ensp00000331504 | fes     | 4659 | 0.48110285  | 10.86573611  | 0.00062077  |
| ensp00000329797 | cadm1   | 9395 | 0.97015696  | 2.262590832  | 0.000628584 |
| ensp00000259988 | fgfbp1  | 7132 | 0.736472532 | 2.086206897  | 0.000628741 |
| ensp00000256935 | dock2   | 4871 | 0.50299463  | 2.075075144  | 0.000640681 |
| ensp00000259206 | il1rn   | 8756 | 0.90417183  | 3.430533142  | 0.000646588 |
| ensp00000312397 | klhl3   | 2138 | 0.220776539 | 8.573333333  | 0.000657724 |
| ensp00000314151 | klk3    | 5384 | 0.555968608 | -21.39395455 | 0.000659988 |
| ensp00000297404 | kcnv1   | 8472 | 0.874845105 | -3.929245936 | 0.000663962 |
| ensp00000304004 | foxa3   | 5485 | 0.566398183 | 2.149138382  | 0.000674311 |
| ensp00000254691 | card6   | 7588 | 0.783560512 | 2.090784044  | 0.00069375  |
| ensp00000406367 | gpr124  | 6290 | 0.64952499  | 2.133021824  | 0.000717474 |
| ensp00000249750 | aldh1a2 | 7729 | 0.798120611 | 4.58219335   | 0.000727153 |
| ensp00000361214 | nrg3    | 9183 | 0.94826518  | 15.02439024  | 0.000731798 |
| ensp00000263126 | akr1c4  | 7756 | 0.800908715 | -3.338503876 | 0.000736641 |

|                 |         |      |             |              |             |
|-----------------|---------|------|-------------|--------------|-------------|
| ensp00000353475 | cldn7   | 6939 | 0.716542751 | 2.236950469  | 0.000737108 |
| ensp00000299333 | scn3b   | 286  | 0.029533251 | 10.20224696  | 0.000738427 |
| ensp00000258411 | wnt10a  | 3720 | 0.384138786 | 3.658335     | 0.000744936 |
| ensp00000354822 | xaf1    | 5363 | 0.553800083 | 8.348423845  | 0.000769253 |
| ensp00000257818 | lmo2    | 7139 | 0.737195374 | 17.66369233  | 0.000796882 |
| ensp00000278187 | gas2    | 6702 | 0.692069393 | -3.598331796 | 0.000804642 |
| ensp00000265643 | gal     | 4036 | 0.41676993  | 9.073721154  | 0.000804845 |
| ensp00000361366 | sftpd   | 3294 | 0.340148699 | 7.959649309  | 0.000812159 |
| ensp00000305603 | fut3    | 9242 | 0.954357703 | 16.13636762  | 0.000816259 |
| ensp00000291670 | ftcd    | 8260 | 0.852953325 | 4.066668966  | 0.000818603 |
| ensp00000263925 | lnx1    | 6800 | 0.702189178 | 7.854649915  | 0.00084086  |
| ensp00000353198 | pyy     | 3951 | 0.407992565 | 5.625857143  | 0.000869072 |
| ensp00000420168 | gsta2   | 7805 | 0.805968608 | -2.053712943 | 0.000871433 |
| ensp00000258443 | edar    | 113  | 0.011668732 | 6.442307692  | 0.000882326 |
| ensp00000289429 | cd1a    | 7337 | 0.75764147  | 3.995438356  | 0.000897145 |
| ensp00000369003 | trpc4   | 5124 | 0.529120198 | 3.391553037  | 0.000907518 |
| ensp00000362334 | psmb2   | 2515 | 0.259706733 | 2.064373016  | 0.000907935 |
| ensp00000261523 | rora    | 3320 | 0.34283354  | 2.164024078  | 0.00091683  |
| ensp00000287713 | nmnat2  | 2775 | 0.286555143 | 9.16         | 0.000925739 |
| ensp00000352064 | klrc1   | 5982 | 0.61771995  | 6.743716957  | 0.000930448 |
| ensp00000302707 | fpr1    | 4013 | 0.414394878 | -4.43949313  | 0.000938893 |
| ensp00000322390 | fgf13   | 5044 | 0.520859149 | 3.629627778  | 0.000944841 |
| ensp00000324527 | myo1d   | 7237 | 0.747315159 | 2.064266975  | 0.00095134  |
| ensp00000317145 | gdnf    | 4764 | 0.491945477 | 2.506666667  | 0.000953695 |
| ensp00000362784 | or5c1   | 9514 | 0.982445271 | 2.515994704  | 0.000966207 |
| ensp00000277120 | ntrk2   | 4614 | 0.47645601  | 3.437698628  | 0.000967148 |
| ensp00000379204 | bmp7    | 5815 | 0.60047501  | 9.076278878  | 0.000988514 |
| ensp00000410443 | hla-dra | 5721 | 0.590768278 | -3.258780737 | 0.00100605  |
| ensp00000372608 | hla-dra | 5724 | 0.591078067 | -3.258780737 | 0.00100605  |
| ensp00000372746 | hla-dra | 6381 | 0.658921933 | -3.258780737 | 0.00100605  |
| ensp00000402951 | hla-dra | 6501 | 0.671313507 | -3.258780737 | 0.00100605  |
| ensp00000405295 | hla-dra | 9175 | 0.947439075 | -3.258780737 | 0.00100605  |
| ensp00000348888 | pigr    | 5184 | 0.535315985 | 8.12586145   | 0.00103682  |
| ensp00000358423 | rragd   | 3548 | 0.36637753  | 2.215434084  | 0.00105114  |
| ensp00000282499 | gria4   | 6747 | 0.696716233 | 6.855716418  | 0.00105278  |
| ensp00000307875 | b3gat1  | 6178 | 0.637959521 | 10.12697619  | 0.00105394  |
| ensp00000295156 | vsnl1   | 8115 | 0.837980173 | -2.456845274 | 0.00105602  |
| ensp00000255189 | dmgdh   | 8162 | 0.84283354  | 3.358125678  | 0.00107681  |
| ensp00000375748 | fut2    | 9241 | 0.95425444  | 10.67126119  | 0.00108607  |
| ensp00000217086 | sall4   | 7246 | 0.748244527 | 3.858333333  | 0.00108925  |
| ensp00000388548 | cited1  | 3217 | 0.332197439 | -2.125377799 | 0.00109019  |
| ensp00000236147 | sell    | 6977 | 0.720466749 | 5.54237476   | 0.00109823  |
| ensp00000357461 | chrnb2  | 8374 | 0.86472532  | 2.688268519  | 0.00110949  |
| ensp00000362616 | nap1l2  | 25   | 0.002581578 | 2.229421053  | 0.00114621  |
| ensp00000291294 | ptgir   | 3853 | 0.39787278  | 9.234840909  | 0.00115384  |
| ensp00000341032 | wnt7b   | 3699 | 0.38197026  | 2.378927911  | 0.00116582  |
| ensp00000003084 | cftr    | 3256 | 0.336224701 | 11.17045455  | 0.00121097  |

|                 |          |      |             |              |            |
|-----------------|----------|------|-------------|--------------|------------|
| ensp00000381654 | hmgcl1   | 8205 | 0.847273854 | 3.946425483  | 0.00121305 |
| ensp00000360806 | kcnb1    | 8389 | 0.866274267 | -3.980178378 | 0.00121332 |
| ensp00000420419 | jam2     | 5213 | 0.538310615 | 2.447920967  | 0.00122548 |
| ensp00000260682 | cyp2c9   | 7752 | 0.800495663 | -3.790232759 | 0.00122733 |
| ensp00000287020 | gdf6     | 5925 | 0.611833953 | 2.971303337  | 0.00123088 |
| ensp00000301732 | abca3    | 1120 | 0.115654688 | 2.304288991  | 0.00123502 |
| ensp00000288135 | kit      | 4683 | 0.483581165 | 14.87877273  | 0.00124458 |
| ensp00000374309 | lama1    | 5570 | 0.575175547 | 2.254828977  | 0.00125813 |
| ensp00000341682 | slc26a9  | 6924 | 0.714993804 | 5.672131148  | 0.00128743 |
| ensp00000263686 | selp     | 6078 | 0.627633209 | 5.862976562  | 0.0013312  |
| ensp00000357013 | cd244    | 5995 | 0.619062371 | 3.562279871  | 0.00135314 |
| ensp00000369323 | npnt     | 6080 | 0.627839736 | 7.522699602  | 0.00135654 |
| ensp00000216629 | bdkrb1   | 4133 | 0.426786452 | 2.438705744  | 0.00138145 |
| ensp00000265728 | dbf4     | 2326 | 0.240190004 | -3.208462559 | 0.00139923 |
| ensp00000300406 | gngt2    | 4244 | 0.438248658 | 4.173        | 0.00141045 |
| ensp00000227752 | il10ra   | 4641 | 0.479244114 | 9.337016208  | 0.00142385 |
| ensp00000393847 | pla2g10  | 7579 | 0.782631144 | 12.22222222  | 0.00145371 |
| ensp00000361009 | prex1    | 4310 | 0.445064023 | 2.53091308   | 0.00147265 |
| ensp00000285393 | atp6v0d2 | 8558 | 0.883725733 | 4.736609493  | 0.00153481 |
| ensp00000355245 | pax9     | 625  | 0.064539447 | -2.042850455 | 0.00153853 |
| ensp00000329668 | shc4     | 4848 | 0.500619579 | 2.510723217  | 0.00156615 |
| ensp00000305355 | prkcb    | 5216 | 0.538620405 | -11.06915007 | 0.00157441 |
| ensp00000373024 | c6orf15  | 6334 | 0.654068567 | 8.120682655  | 0.00157648 |
| ensp00000261374 | hs3st2   | 6068 | 0.626600578 | 4.147854417  | 0.00158546 |
| ensp00000354478 | dlx1     | 1325 | 0.136823627 | 2.72444      | 0.00158805 |
| ensp00000311997 | nefh     | 5803 | 0.599235853 | 4.125568493  | 0.00159632 |
| ensp00000358309 | epha7    | 4809 | 0.496592317 | 13.66240298  | 0.00160497 |
| ensp00000356505 | ncf2     | 5279 | 0.545125981 | 4.906145631  | 0.00162509 |
| ensp00000245479 | sox9     | 1758 | 0.181536555 | 5.547356454  | 0.00163661 |
| ensp00000359603 | col24a1  | 5698 | 0.588393226 | 3.747743243  | 0.00165979 |
| ensp00000355378 | plxnb3   | 6236 | 0.643948781 | 3.530927835  | 0.00166183 |
| ensp00000360561 | entpd8   | 2616 | 0.270136307 | -5.09375     | 0.00174171 |
| ensp00000155840 | kcnq1    | 8273 | 0.854295746 | 13.92360417  | 0.00176815 |
| ensp00000365943 | pcsk5    | 6258 | 0.64622057  | 2.404695593  | 0.0017839  |
| ensp00000377303 | renbp    | 8856 | 0.914498141 | 2.379312909  | 0.00178769 |
| ensp00000362299 | eng      | 3465 | 0.357806691 | 2.375110758  | 0.00183576 |
| ensp00000262752 | rps6ka6  | 4454 | 0.459933912 | 6.074764521  | 0.00184097 |
| ensp00000285949 | cyp26c1  | 7664 | 0.791408509 | 2.30658642   | 0.00185084 |
| ensp00000295731 | ihh      | 5853 | 0.604399009 | -4.138646018 | 0.00185817 |
| ensp00000340937 | col17a1  | 5697 | 0.588289963 | 3.474293284  | 0.00187266 |
| ensp00000260187 | usp2     | 2982 | 0.307930607 | -2.591016178 | 0.0018845  |
| ensp00000310244 | rasgrp1  | 5067 | 0.523234201 | 10.97143484  | 0.00189432 |
| ensp00000363680 | eda      | 114  | 0.011771995 | 6.245617225  | 0.00190006 |
| ensp00000304408 | col3a1   | 5660 | 0.584469228 | 24.16664286  | 0.00190219 |
| ensp00000220507 | rhov     | 5073 | 0.523853779 | 2.264705882  | 0.00192221 |
| ensp00000301908 | pnoc     | 4009 | 0.413981826 | 11.00002658  | 0.0019231  |
| ensp00000352561 | calcr    | 3854 | 0.397976043 | -2.050762099 | 0.00193555 |



|                 |         |      |             |              |            |
|-----------------|---------|------|-------------|--------------|------------|
| ensp00000257549 | sds     | 8150 | 0.841594382 | -2.041204946 | 0.00193727 |
| ensp00000330442 | plb1    | 7575 | 0.782218092 | 2.057804905  | 0.00195238 |
| ensp00000294117 | gng3    | 4193 | 0.432982239 | -3.991602517 | 0.00196417 |
| ensp00000385149 | neu4    | 8139 | 0.840458488 | -4.69307163  | 0.0019793  |
| ensp00000252971 | mnx1    | 9381 | 0.968711276 | 9.34321638   | 0.0019813  |
| ensp00000271636 | cgn     | 5144 | 0.531185461 | 2.025493608  | 0.00201688 |
| ensp00000205948 | apoh    | 5787 | 0.597583643 | -4.41176656  | 0.00212133 |
| ensp00000200307 | ccl7    | 4077 | 0.421003717 | 6.596389516  | 0.00213953 |
| ensp00000288490 | dgki    | 7200 | 0.743494424 | 5.563097117  | 0.00214467 |
| ensp00000302269 | vav1    | 4831 | 0.498864106 | 8.061946045  | 0.00216638 |
| ensp00000289746 | cdh15   | 4579 | 0.472841801 | -3.013908521 | 0.00218102 |
| ensp00000299339 | cldn10  | 6957 | 0.718401487 | 11.38725     | 0.00219681 |
| ensp00000288139 | cacna1d | 5174 | 0.534283354 | -3.67293478  | 0.00226372 |
| ensp00000369962 | igsf5   | 5212 | 0.538207352 | -5.372006149 | 0.00226662 |
| ensp00000354280 | prss3   | 5619 | 0.58023544  | 3.344739927  | 0.00230447 |
| ensp00000417229 | eif2a   | 1283 | 0.132486576 | -2.374434138 | 0.00241877 |
| ensp00000296029 | pf4     | 4336 | 0.447748864 | 5.332610865  | 0.00244271 |
| ensp00000249016 | mchr1   | 4104 | 0.423791822 | 9.590485714  | 0.00244593 |
| ensp00000332116 | pde4b   | 2714 | 0.280256093 | 10.5         | 0.00245842 |
| ensp00000386896 | itga6   | 5563 | 0.574452705 | 3.319878658  | 0.00248379 |
| ensp00000336829 | fgg     | 5421 | 0.559789343 | -5.572908774 | 0.00249683 |
| ensp00000312506 | cspg4   | 6090 | 0.628872367 | 5.084418886  | 0.00261399 |
| ensp00000375069 | col23a1 | 5712 | 0.58983891  | -2.40740625  | 0.00274797 |
| ensp00000408617 | hdac9   | 2967 | 0.30638166  | 9.840931637  | 0.00275596 |
| ensp00000318212 | kcnh6   | 8456 | 0.873192895 | -4.558305498 | 0.00276444 |
| ensp00000222482 | cpa4    | 24   | 0.002478315 | 3.25407915   | 0.00285372 |
| ensp00000243997 | atp5e   | 8622 | 0.890334572 | -3.247026786 | 0.00296649 |
| ensp00000362566 | hpc     | 6752 | 0.697232549 | 6.510376145  | 0.00298115 |
| ensp00000284562 | gsta5   | 7807 | 0.806175134 | -4.267326733 | 0.00300445 |
| ensp00000363081 | dkk1    | 3735 | 0.385687732 | 2.177283439  | 0.00303483 |
| ensp00000319343 | cpt1c   | 7610 | 0.785832301 | 7.304276923  | 0.00306099 |
| ensp00000233954 | il1r1   | 7414 | 0.76559273  | 12.99999651  | 0.00306689 |
| ensp00000341138 | epb41l3 | 3614 | 0.373192895 | 6.621118012  | 0.00309331 |
| ensp00000363512 | alox5   | 7677 | 0.792750929 | 4.410008516  | 0.00318019 |
| ensp00000360762 | ankrd1  | 3587 | 0.370404791 | 5.122907753  | 0.00328646 |
| ensp00000350332 | mybpc2  | 5914 | 0.610698059 | 8.791497358  | 0.00332724 |
| ensp00000256722 | cmpk2   | 2634 | 0.271995043 | 6.383092912  | 0.00340272 |
| ensp00000338548 | fgf1    | 5084 | 0.524989674 | 3.284856784  | 0.00340361 |
| ensp00000262345 | il12rb2 | 4529 | 0.467678645 | 4.808360694  | 0.00340984 |
| ensp00000328674 | cldn6   | 6942 | 0.71685254  | 7.301037128  | 0.00347216 |
| ensp00000255465 | ccna1   | 2422 | 0.250103263 | 2.707922906  | 0.00352968 |
| ensp00000317310 | cabp1   | 5185 | 0.535419248 | -6.916673077 | 0.0035445  |
| ensp00000239243 | msx2    | 1241 | 0.128149525 | -2.869558651 | 0.00367765 |
| ensp00000354609 | cnksr1  | 5122 | 0.528913672 | 3.305861305  | 0.00376426 |
| ensp00000264012 | cdh3    | 3799 | 0.392296572 | 4.947531915  | 0.00376706 |
| ensp00000261826 | p2rx7   | 1192 | 0.123089632 | 6.387604651  | 0.00387559 |
| ensp00000303208 | pcsk9   | 6295 | 0.650041305 | 3.779419939  | 0.00388316 |

|                 |          |      |             |              |            |
|-----------------|----------|------|-------------|--------------|------------|
| ensp00000264917 | pde8b    | 3848 | 0.397356464 | -2.138188095 | 0.00399098 |
| ensp00000256759 | fst      | 5875 | 0.606670797 | 4.086333062  | 0.0041566  |
| ensp00000384169 | fbln2    | 5947 | 0.614105741 | 4.18673822   | 0.00422588 |
| ensp00000350256 | ccr9     | 4030 | 0.416150351 | 8.755317825  | 0.0042585  |
| ensp00000262441 | glp2r    | 3845 | 0.397046675 | -2.034159885 | 0.00427936 |
| ensp00000372170 | msx1     | 1690 | 0.174514663 | -2.549055221 | 0.00432845 |
| ensp00000225245 | ccl3     | 4075 | 0.420797191 | 5.081635246  | 0.0044796  |
| ensp00000364336 | tbxa2r   | 4411 | 0.455493598 | 5.515969457  | 0.00448403 |
| ensp00000378577 | cldn3    | 6953 | 0.717988435 | 4.915029933  | 0.00449438 |
| ensp00000386069 | adra2c   | 3994 | 0.412432879 | 2.357584383  | 0.00453235 |
| ensp00000267502 | rdh12    | 7723 | 0.797501033 | -5.388354746 | 0.00458433 |
| ensp00000240617 | plbd1    | 7480 | 0.772408096 | 5.221183822  | 0.00459683 |
| ensp00000252945 | cyp2e1   | 7749 | 0.800185874 | 4            | 0.00462298 |
| ensp00000219150 | coro1a   | 5921 | 0.6114209   | 2.460607273  | 0.00464528 |
| ensp00000245919 | fosb     | 4487 | 0.463341594 | 2.95041844   | 0.00466014 |
| ensp00000254661 | ramp1    | 3779 | 0.390231309 | 6.517368732  | 0.00466874 |
| ensp00000346901 | fmo1     | 7759 | 0.801218505 | -3.24648659  | 0.00471725 |
| ensp00000336591 | ppp2r2b  | 3264 | 0.337050805 | 4.920607743  | 0.00482198 |
| ensp00000233809 | igfbp2   | 5745 | 0.593246592 | 4.080906149  | 0.00493268 |
| ensp00000379154 | rasgef1a | 6382 | 0.659025196 | 3.298980152  | 0.00493576 |
| ensp00000388373 | ppfia2   | 2914 | 0.300908715 | -2.266749347 | 0.00507743 |
| ensp00000264568 | bmpr1b   | 5818 | 0.6007848   | -2.400946537 | 0.00511849 |
| ensp00000359892 | slc44a5  | 4804 | 0.496076002 | 14.08958819  | 0.0052223  |
| ensp00000371432 | prlr     | 4758 | 0.491325898 | -4.990023262 | 0.00537009 |
| ensp00000330330 | tmprss2  | 1514 | 0.156340355 | 3.961846101  | 0.00544492 |
| ensp00000360626 | kcng1    | 8471 | 0.874741842 | 2.192008772  | 0.00548366 |
| ensp00000312185 | elmo1    | 4872 | 0.503097893 | 7.217391304  | 0.00552998 |
| ensp00000343318 | b3galt5  | 9225 | 0.95260223  | -9.166666667 | 0.0056483  |
| ensp00000357789 | flg      | 7174 | 0.740809583 | 3.172686575  | 0.00566665 |
| ensp00000369858 | alox5ap  | 7647 | 0.789653036 | 3.171370722  | 0.0057822  |
| ensp00000264839 | rims1    | 6991 | 0.721912433 | 3.015742907  | 0.00581889 |
| ensp00000358802 | kcnc4    | 8444 | 0.871953738 | 2.87344199   | 0.00590851 |
| ensp00000230361 | guca1b   | 1939 | 0.200227179 | -4.090204077 | 0.00592181 |
| ensp00000295408 | mertk    | 5599 | 0.578170178 | 3.137204687  | 0.0059453  |
| ensp00000369050 | cyp1a1   | 7719 | 0.79708798  | 3.924212607  | 0.00595916 |
| ensp00000321106 | tac1     | 4169 | 0.430503924 | 3.768290385  | 0.00597637 |
| ensp00000263816 | lrp2     | 5830 | 0.602023957 | -4.765757295 | 0.00609611 |
| ensp00000363079 | mbi2     | 7449 | 0.769206939 | -10.17392189 | 0.00612646 |
| ensp00000361914 | oxct2    | 8025 | 0.828686493 | 3.261347418  | 0.00618922 |
| ensp00000374372 | sptb     | 4741 | 0.489570425 | 3.666669725  | 0.00621648 |
| ensp00000353154 | nfasc    | 6839 | 0.706216439 | 2.323279443  | 0.00684147 |
| ensp00000360020 | diras3   | 1487 | 0.153552251 | 9.315779668  | 0.00685814 |
| ensp00000296474 | mst1r    | 3615 | 0.373296159 | 3.75684117   | 0.00708146 |
| ensp00000414598 | mrvi1    | 3621 | 0.373915737 | -3.022807892 | 0.00718912 |
| ensp00000354900 | gjb1     | 9103 | 0.940004131 | -5.028484382 | 0.00719417 |
| ensp00000260598 | khk      | 7322 | 0.756092524 | -2.540983607 | 0.00722526 |
| ensp00000410715 | sfrp4    | 3695 | 0.381557208 | -6.084287356 | 0.00725236 |

|                 |          |      |             |              |            |
|-----------------|----------|------|-------------|--------------|------------|
| ensp00000386209 | or2a2    | 9556 | 0.986782321 | 2            | 0.00735018 |
| ensp00000301466 | soat2    | 7821 | 0.807620818 | 2.837209302  | 0.0073978  |
| ensp00000328181 | nog      | 5890 | 0.608219744 | 4.13475      | 0.00751963 |
| ensp00000393379 | kif5c    | 6160 | 0.636100785 | 6.515693505  | 0.00762179 |
| ensp00000257572 | hrk      | 3443 | 0.355534903 | 4.382121951  | 0.00774568 |
| ensp00000366249 | ubd      | 2106 | 0.217472119 | 3.714301906  | 0.00793468 |
| ensp00000199764 | ceacam6  | 9012 | 0.930607187 | 7.245759642  | 0.00805557 |
| ensp00000324494 | grhl1    | 3431 | 0.354295746 | 4.037837838  | 0.00818461 |
| ensp00000085219 | cd22     | 4952 | 0.511358943 | -7.858325    | 0.00826404 |
| ensp00000282096 | pde3b    | 2717 | 0.280565882 | 14.28        | 0.00828169 |
| ensp00000338072 | avpr2    | 3821 | 0.39456836  | 3.011224688  | 0.00832125 |
| ensp00000369531 | ubqlnl   | 1520 | 0.156959934 | -2.617716237 | 0.00833804 |
| ensp00000320130 | dync1i1  | 3136 | 0.323833127 | 3.203238345  | 0.00838799 |
| ensp00000369530 | alox15b  | 7676 | 0.792647666 | 2.395152474  | 0.00843067 |
| ensp00000306459 | b4galt6  | 8588 | 0.886823627 | 3.208        | 0.00845798 |
| ensp00000329454 | rca2     | 531  | 0.054832714 | 2.145310944  | 0.00852552 |
| ensp00000337255 | kcne1    | 8484 | 0.876084263 | 4.472982752  | 0.0088586  |
| ensp00000254695 | rap1gap2 | 3795 | 0.391883519 | 3.166352353  | 0.00886671 |
| ensp00000414187 | cpeb1    | 2529 | 0.261152416 | 2.51465711   | 0.00890127 |
| ensp00000221700 | cyp4f2   | 7618 | 0.786658406 | -4.257257878 | 0.00891864 |
| ensp00000368872 | insc     | 315  | 0.032527881 | 3.889868757  | 0.0089638  |
| ensp00000244333 | lypd3    | 84   | 0.008674102 | 2.05186353   | 0.00908366 |
| ensp00000387230 | upp2     | 2684 | 0.277158199 | -7.304689606 | 0.00939085 |
| ensp00000263373 | sptbn4   | 4740 | 0.489467162 | 3.515093224  | 0.0094471  |
| ensp00000234347 | prrn3    | 3451 | 0.356361008 | -2.292222128 | 0.00945511 |
| ensp00000333122 | nr4a3    | 8987 | 0.928025609 | 2.415669323  | 0.00948869 |
| ensp00000304782 | ces3     | 2738 | 0.282734407 | 2.754067073  | 0.00962081 |
| ensp00000353864 | pak3     | 4736 | 0.48905411  | 2.27728698   | 0.00970403 |
| ensp00000239849 | tnfsf11  | 6437 | 0.664704667 | 4.760421875  | 0.00984965 |
| ensp00000329210 | or2t10   | 9592 | 0.990499793 | -2.777428314 | 0.00990853 |
| ensp00000078445 | creb3l3  | 3889 | 0.401590252 | -5.285117651 | 0.0099227  |

#### Significantly Changed Genes C-ADPKD vs. NC-ADPKD

| Protein         | Gene Symbol | Position | Relative Position | Fold Change | P value  |
|-----------------|-------------|----------|-------------------|-------------|----------|
| ensp00000064724 | cldn11      | 6940     | 0.716646014       | 44.51178571 | 2.56E-10 |
| ensp00000342445 | cldn4       | 6958     | 0.71850475        | 2.383543642 | 3.59E-10 |
| ensp00000220772 | sfrp1       | 3693     | 0.381350682       | 29.67964047 | 6.60E-09 |
| ensp00000291009 | pip         | 9186     | 0.948574969       | 17.53212618 | 7.01E-09 |
| ensp00000296370 | s100p       | 108      | 0.011152416       | 13.33333333 | 7.43E-09 |
| ensp00000270279 | cb1c        | 4731     | 0.488537794       | 17.91788961 | 8.59E-09 |
| ensp00000260404 | pak6        | 4735     | 0.488950847       | 11.07691699 | 1.31E-08 |
| ensp00000364898 | syk         | 4836     | 0.499380421       | 24.75       | 2.05E-08 |
| ensp00000296027 | cxcl5       | 4061     | 0.419351508       | 2.185981453 | 2.18E-08 |
| ensp00000229030 | fzd10       | 3730     | 0.385171417       | 19.23864686 | 2.27E-08 |
| ensp00000332643 | ndn         | 3762     | 0.388475836       | 33.91955172 | 4.18E-08 |
| ensp00000364336 | tbxa2r      | 4411     | 0.455493598       | 2.289182119 | 9.45E-08 |

|                 |            |      |             |              |          |
|-----------------|------------|------|-------------|--------------|----------|
| ensp00000309270 | chst1      | 9289 | 0.95921107  | -15.91204827 | 1.01E-07 |
| ensp00000338185 | plcb1      | 4457 | 0.460243701 | 8.126586393  | 1.09E-07 |
| ensp00000371471 | rsad2      | 5347 | 0.552147873 | 22.38824987  | 1.25E-07 |
| ensp00000354376 | rab25      | 7494 | 0.773853779 | 22.79829177  | 2.30E-07 |
| ensp00000263339 | il1a       | 4388 | 0.453118546 | 21.37931034  | 2.95E-07 |
| ensp00000255192 | bhmt2      | 7900 | 0.815778604 | 21.19846473  | 5.11E-07 |
| ensp00000312021 | fut1       | 9240 | 0.954151177 | 3.408705236  | 5.46E-07 |
| ensp00000258499 | usp44      | 520  | 0.053696819 | 16.49109508  | 5.65E-07 |
| ensp00000369962 | igsf5      | 5212 | 0.538207352 | -5.439998176 | 7.30E-07 |
| ensp00000356505 | ncf2       | 5279 | 0.545125981 | 5.573523686  | 7.36E-07 |
| ensp00000350928 | gad1       | 7909 | 0.816707972 | 13.09152333  | 7.61E-07 |
| ensp00000167586 | krt14      | 3446 | 0.355844692 | 18.98865794  | 9.42E-07 |
| ensp00000329468 | adap2      | 6190 | 0.639198678 | 2.008806911  | 9.81E-07 |
| ensp00000358042 | qrsl1      | 68   | 0.007021892 | -2.536358531 | 9.84E-07 |
| ensp00000362171 | nap1l3     | 26   | 0.002684841 | 12.58620467  | 1.55E-06 |
| ensp00000330658 | pappa      | 5744 | 0.593143329 | 2.035979733  | 1.59E-06 |
| ensp00000357040 | vangl2     | 3540 | 0.365551425 | 22.72943851  | 1.69E-06 |
| ensp00000279804 | ctf1       | 6015 | 0.621127633 | 2.069220061  | 1.69E-06 |
| ensp00000386896 | itga6      | 5563 | 0.574452705 | 2.835539697  | 1.82E-06 |
| ensp00000296849 | nkd2       | 3549 | 0.366480793 | -2.658345964 | 1.85E-06 |
| ensp00000330074 | hist1h1b   | 2012 | 0.207765386 | 15.98278618  | 2.05E-06 |
| ensp00000368632 | gata3      | 3232 | 0.333746386 | 17.58931035  | 2.81E-06 |
| ensp00000369071 | postn      | 7251 | 0.748760843 | 18.47654025  | 2.91E-06 |
| ensp00000259396 | orm1       | 8431 | 0.870611318 | -2.138476574 | 3.12E-06 |
| ensp00000398028 | npr3       | 8551 | 0.883002891 | -2.405876033 | 3.14E-06 |
| ensp00000348170 | hp         | 8651 | 0.893329203 | -2.445684988 | 3.21E-06 |
| ensp00000321853 | serpinf2   | 5259 | 0.543060719 | -3.221041573 | 3.55E-06 |
| ensp00000377265 | tfap2b     | 334  | 0.03448988  | 21.40208392  | 3.72E-06 |
| ensp00000270800 | il22ra1    | 4621 | 0.477178852 | -2.674908702 | 3.85E-06 |
| ensp00000243213 | il13ra2    | 4592 | 0.474184221 | 17.93752494  | 3.90E-06 |
| ensp00000379310 | casc1      | 1584 | 0.163568773 | -2.344579919 | 4.36E-06 |
| ensp00000358423 | rragd      | 3548 | 0.36637753  | 2.234205521  | 4.49E-06 |
| ensp00000355920 | slc22a2    | 6993 | 0.722118959 | 15.60712457  | 4.70E-06 |
| ensp00000312987 | hnf4a      | 3291 | 0.33983891  | -4.495562301 | 4.82E-06 |
| ensp00000296435 | camp       | 603  | 0.062267658 | -12.98484091 | 4.83E-06 |
| ensp00000359410 | ephx4      | 7459 | 0.77023957  | 2.543785453  | 4.84E-06 |
| ensp00000306099 | fgb        | 5420 | 0.55968608  | -2.406823649 | 5.40E-06 |
| ensp00000339292 | cldn14     | 6963 | 0.719021066 | 16.92308225  | 6.12E-06 |
| ensp00000417583 | st6galnac5 | 9234 | 0.953531599 | 11.24444444  | 6.15E-06 |
| ensp00000228938 | mgp        | 5149 | 0.531701776 | 13.27536232  | 7.02E-06 |
| ensp00000295550 | col6a3     | 5688 | 0.587360595 | 5.25159387   | 7.51E-06 |
| ensp00000250448 | foxa1      | 5483 | 0.566191656 | 4.321700959  | 8.74E-06 |
| ensp00000343318 | b3galt5    | 9225 | 0.95260223  | -9.211116667 | 8.76E-06 |
| ensp00000347379 | ocln       | 6965 | 0.719227592 | 3.548515545  | 9.36E-06 |
| ensp00000306361 | fga        | 5419 | 0.559582817 | -13.13548185 | 9.49E-06 |
| ensp00000291294 | ptgir      | 3853 | 0.39787278  | 5.46636568   | 9.78E-06 |
| ensp00000255189 | dmgdh      | 8162 | 0.84283354  | 10.00514948  | 9.82E-06 |

|                 |          |      |             |              |          |
|-----------------|----------|------|-------------|--------------|----------|
| ensp00000245312 | slc10a2  | 8413 | 0.868752582 | -3.27800551  | 1.00E-05 |
| ensp00000264260 | il18rap  | 4285 | 0.442482445 | -14.10436879 | 1.00E-05 |
| ensp00000301732 | abca3    | 1120 | 0.115654688 | 2.602772021  | 1.08E-05 |
| ensp00000282111 | tcf7l1   | 3411 | 0.352230483 | 5.294101257  | 1.26E-05 |
| ensp00000303153 | col22a1  | 5701 | 0.588703015 | 14.21212121  | 1.38E-05 |
| ensp00000335083 | ppp2r2c  | 3265 | 0.337154069 | 13.4959812   | 1.40E-05 |
| ensp00000293272 | ccl5     | 4058 | 0.419041718 | 5.427583054  | 1.46E-05 |
| ensp00000357789 | flg      | 7174 | 0.740809583 | 3.458573177  | 1.49E-05 |
| ensp00000298472 | slc18a2  | 7030 | 0.725939694 | 12.08618786  | 1.54E-05 |
| ensp00000383558 | gcgr     | 4125 | 0.425960347 | 15.66943444  | 1.87E-05 |
| ensp00000363079 | mbi2     | 7449 | 0.769206939 | -11.27826198 | 1.92E-05 |
| ensp00000344874 | gucy1a2  | 2353 | 0.242978108 | -2.812584289 | 2.02E-05 |
| ensp00000406367 | gpr124   | 6290 | 0.64952499  | 2.048008152  | 2.05E-05 |
| ensp00000260197 | sorl1    | 8269 | 0.853882693 | 18.16936949  | 2.12E-05 |
| ensp00000309148 | klk6     | 7438 | 0.768071045 | 5.281660553  | 2.21E-05 |
| ensp00000226524 | pf4v1    | 3952 | 0.408095828 | 10.77097651  | 2.28E-05 |
| ensp00000321735 | slc16a8  | 7312 | 0.755059893 | 10.12357289  | 2.32E-05 |
| ensp00000284440 | uchl1    | 3180 | 0.328376704 | 3.498111152  | 2.45E-05 |
| ensp00000312397 | klhl3    | 2138 | 0.220776539 | 14.39551165  | 2.67E-05 |
| ensp00000352272 | myoz1    | 6213 | 0.64157373  | 12.20213     | 2.71E-05 |
| ensp00000252971 | mnx1     | 9381 | 0.968711276 | 20.04543632  | 2.93E-05 |
| ensp00000306157 | il7r     | 4596 | 0.474597274 | 7.607705852  | 2.93E-05 |
| ensp00000228850 | akap3    | 8638 | 0.891986782 | 8.813735294  | 3.09E-05 |
| ensp00000302648 | nrtm     | 6002 | 0.619785213 | -4.096161723 | 3.23E-05 |
| ensp00000253513 | ido1     | 7944 | 0.820322181 | 11.53880822  | 3.27E-05 |
| ensp00000261769 | cdh1     | 3594 | 0.371127633 | 2.39973029   | 3.31E-05 |
| ensp00000266085 | timp3    | 6030 | 0.62267658  | 27.15913314  | 3.40E-05 |
| ensp00000354207 | ntrk3    | 4738 | 0.489260636 | -3.690931034 | 3.41E-05 |
| ensp00000263182 | bbox1    | 8124 | 0.838909542 | -16.54309781 | 3.53E-05 |
| ensp00000363157 | tnfsf15  | 6765 | 0.698574969 | 16.5454486   | 3.70E-05 |
| ensp00000288221 | erc2     | 7029 | 0.725836431 | 3.912391026  | 3.74E-05 |
| ensp00000245912 | tnfsf14  | 6700 | 0.691862867 | -3.779492308 | 4.00E-05 |
| ensp00000262262 | cd33     | 8714 | 0.899834779 | -23.50946557 | 4.35E-05 |
| ensp00000283921 | hoxa10   | 137  | 0.014147047 | 9.357671298  | 4.64E-05 |
| ensp00000420419 | jam2     | 5213 | 0.538310615 | 3.130434783  | 4.65E-05 |
| ensp00000289422 | nrg2     | 4649 | 0.480070219 | 8.783217634  | 4.66E-05 |
| ensp00000394033 | kcnk2    | 9358 | 0.966336225 | -3.576407304 | 4.74E-05 |
| ensp00000316328 | ciita    | 5324 | 0.549772821 | -10.40362675 | 4.94E-05 |
| ensp00000172229 | ngfr     | 4432 | 0.457662123 | -10.84090293 | 5.03E-05 |
| ensp00000310721 | cyp7b1   | 7843 | 0.809892606 | -2.123720859 | 5.17E-05 |
| ensp00000282728 | hhex     | 9383 | 0.968917803 | 12.79431915  | 5.25E-05 |
| ensp00000260795 | fgfr3    | 4877 | 0.503614209 | -2.477534897 | 5.33E-05 |
| ensp00000254695 | rap1gap2 | 3795 | 0.391883519 | 2.168210373  | 5.56E-05 |
| ensp00000303208 | pcsk9    | 6295 | 0.650041305 | 6.908596774  | 5.64E-05 |
| ensp00000353362 | cacna1a  | 4242 | 0.438042131 | 10.87193849  | 5.65E-05 |
| ensp00000287020 | gdf6     | 5925 | 0.611833953 | 3.737120456  | 5.69E-05 |
| ensp00000308576 | rhod     | 5007 | 0.517038414 | 13.2041868   | 5.87E-05 |

|                 |          |      |             |              |             |
|-----------------|----------|------|-------------|--------------|-------------|
| ensp00000296474 | mst1r    | 3615 | 0.373296159 | 3.279520179  | 5.92E-05    |
| ensp00000272134 | lefty1   | 5813 | 0.600268484 | -6.222710141 | 6.77E-05    |
| ensp00000254508 | nup210   | 1338 | 0.138166047 | 32           | 6.99E-05    |
| ensp00000257818 | lmo2     | 7139 | 0.737195374 | 21.93407905  | 7.07E-05    |
| ensp00000173229 | ntn1     | 4856 | 0.501445684 | 19.30862963  | 7.07E-05    |
| ensp00000396774 | muc20    | 9268 | 0.957042544 | 7.027908359  | 7.16E-05    |
| ensp00000299106 | jam3     | 5214 | 0.538413879 | 15.5651896   | 7.21E-05    |
| ensp00000003084 | cftr     | 3256 | 0.336224701 | 12.03672978  | 7.33E-05    |
| ensp00000346693 | elovl2   | 7559 | 0.780565882 | 2.627751269  | 7.53E-05    |
| ensp00000351682 | cndp1    | 7968 | 0.822800496 | -9.05347543  | 7.93E-05    |
| ensp00000292513 | ptger1   | 4210 | 0.434737712 | 15.8364717   | 8.22E-05    |
| ensp00000284240 | thy1     | 5422 | 0.559892606 | 2.811004464  | 8.67E-05    |
| ensp00000419361 | adcy5    | 3931 | 0.405927303 | 4.247963415  | 8.77E-05    |
| ensp00000308032 | cyp2s1   | 7800 | 0.805452292 | 5.656962305  | 9.28E-05    |
| ensp00000410668 | tnf      | 4314 | 0.445477076 | 8.85         | 9.34E-05    |
| ensp00000392858 | tnf      | 4353 | 0.449504337 | 8.85         | 9.34E-05    |
| ensp00000398698 | tnf      | 4354 | 0.4496076   | 8.85         | 9.34E-05    |
| ensp00000365290 | tnf      | 6348 | 0.65551425  | 8.85         | 9.34E-05    |
| ensp00000338171 | skap1    | 6173 | 0.637443205 | 2.576923077  | 9.34E-05    |
| ensp00000367830 | prkcz    | 4462 | 0.460760017 | 2.335155393  | 9.91E-05    |
| ensp00000277480 | lcn2     | 7529 | 0.777467988 | 3.161949153  | 0.000107292 |
| ensp00000291539 | pde9a    | 2744 | 0.283353986 | 7.755728846  | 0.000114027 |
| ensp00000386069 | adra2c   | 3994 | 0.412432879 | 2.460959935  | 0.000114964 |
| ensp00000330959 | il1r2    | 4391 | 0.453428335 | -2.007916865 | 0.000117318 |
| ensp00000254262 | c19orf40 | 2132 | 0.22015696  | -2.521800719 | 0.000118643 |
| ensp00000308461 | rnd1     | 5027 | 0.519103676 | 3.513906282  | 0.000118796 |
| ensp00000320378 | slc7a8   | 8668 | 0.895084676 | 12.88549398  | 0.000122585 |
| ensp00000342114 | icam4    | 5495 | 0.567430814 | 4.697574719  | 0.000122653 |
| ensp00000290399 | sim2     | 418  | 0.043163982 | 14.98305507  | 0.000127176 |
| ensp00000342235 | erbb4    | 4694 | 0.484717059 | 14.45713967  | 0.000138045 |
| ensp00000264257 | il1rl2   | 8757 | 0.904275093 | 4.672275072  | 0.000139219 |
| ensp00000296414 | dapp1    | 4797 | 0.49535316  | 15.68        | 0.000140646 |
| ensp00000350332 | mybpc2   | 5914 | 0.610698059 | 9.26458263   | 0.000141893 |
| ensp00000351190 | itih2    | 6867 | 0.709107807 | -9.481288493 | 0.000145183 |
| ensp00000264708 | pomc     | 3865 | 0.399111937 | 11.11223356  | 0.000145725 |
| ensp00000327453 | acsm2b   | 8508 | 0.878562577 | -2.966131424 | 0.000149728 |
| ensp00000287641 | sst      | 3946 | 0.407476249 | 3.671968254  | 0.00015939  |
| ensp00000279441 | mmp10    | 5504 | 0.568360182 | 13.07334     | 0.00016102  |
| ensp00000368966 | trpc3    | 5123 | 0.529016935 | -3.109954129 | 0.000168462 |
| ensp00000296641 | f2rl2    | 4414 | 0.455803387 | 10.0152519   | 0.000170865 |
| ensp00000354490 | atp1a2   | 9053 | 0.934840975 | -36.35294118 | 0.000171798 |
| ensp00000263126 | akr1c4   | 7756 | 0.800908715 | -3.033589147 | 0.000181995 |
| ensp00000319343 | cpt1c    | 7610 | 0.785832301 | 8.461386748  | 0.000186937 |
| ensp00000358309 | epha7    | 4809 | 0.496592317 | 8.511904762  | 0.000187425 |
| ensp00000340200 | glyat    | 9084 | 0.938042131 | -6.418103448 | 0.000191124 |
| ensp00000297450 | angpt1   | 4717 | 0.487092111 | -3.552769539 | 0.000195147 |
| ensp00000332116 | pde4b    | 2714 | 0.280256093 | 6.485298886  | 0.000199562 |

|                 |            |      |             |              |             |
|-----------------|------------|------|-------------|--------------|-------------|
| ensp00000357461 | chrnb2     | 8374 | 0.86472532  | 3.584358025  | 0.000211202 |
| ensp00000199764 | ceacam6    | 9012 | 0.930607187 | 9.000004737  | 0.000212397 |
| ensp00000359074 | l1cam      | 5446 | 0.562370921 | 11.67886666  | 0.000216961 |
| ensp00000287713 | nmnat2     | 2775 | 0.286555143 | 2.647398844  | 0.000221315 |
| ensp00000348888 | pigr       | 5184 | 0.535315985 | 13.99997108  | 0.000224224 |
| ensp00000373024 | c6orf15    | 6334 | 0.654068567 | 9.145639947  | 0.000235536 |
| ensp00000234371 | kiss1r     | 4274 | 0.441346551 | 6.694612758  | 0.000244109 |
| ensp00000288135 | kit        | 4683 | 0.483581165 | 8.115700922  | 0.000246724 |
| ensp00000253754 | pdlim4     | 6838 | 0.706113176 | 7.686134192  | 0.000247255 |
| ensp00000410294 | fgfr2      | 4791 | 0.494733581 | -2.570081272 | 0.000251745 |
| ensp00000360918 | ch25h      | 7817 | 0.807207765 | 15.88761136  | 0.000256918 |
| ensp00000258411 | wnt10a     | 3720 | 0.384138786 | 3.310710407  | 0.000261545 |
| ensp00000355884 | mark1      | 2992 | 0.308963238 | 9.770276872  | 0.000264497 |
| ensp00000381654 | hmgcl1     | 8205 | 0.847273854 | 5.122513326  | 0.000264558 |
| ensp00000341138 | epb41l3    | 3614 | 0.373192895 | 5.835755774  | 0.000266616 |
| ensp00000294339 | tal1       | 3153 | 0.3255886   | 7.06122299   | 0.000275796 |
| ensp00000363512 | alox5      | 7677 | 0.792750929 | 2.007598811  | 0.000282394 |
| ensp00000271636 | cgn        | 5144 | 0.531185461 | 3.475094137  | 0.000294001 |
| ensp00000258443 | edar       | 113  | 0.011668732 | 4.466666667  | 0.000294604 |
| ensp00000249750 | aldh1a2    | 7729 | 0.798120611 | 3.15566782   | 0.000303209 |
| ensp00000354822 | xaf1       | 5363 | 0.553800083 | 6.23311232   | 0.000305488 |
| ensp00000329797 | cadm1      | 9395 | 0.97015696  | 2.126596943  | 0.000307571 |
| ensp00000306888 | fam151a    | 7592 | 0.783973565 | -6.929828947 | 0.000307596 |
| ensp00000351206 | txlnb      | 7377 | 0.761771995 | 15.22315308  | 0.00032163  |
| ensp00000156626 | st6galnac1 | 9320 | 0.962412226 | 10.27161111  | 0.000332787 |
| ensp00000420295 | pde6b      | 2724 | 0.281288724 | 16.49314624  | 0.000334515 |
| ensp00000367462 | olah       | 7458 | 0.770136307 | 5.663043478  | 0.000343653 |
| ensp00000365943 | pcsk5      | 6258 | 0.64622057  | 2.600439038  | 0.000345547 |
| ensp00000308012 | pabpc5     | 258  | 0.026641884 | 22.72727273  | 0.000345593 |
| ensp00000274353 | bhmt       | 7901 | 0.815881867 | 3.387465458  | 0.000356248 |
| ensp00000362566 | hpcA       | 6752 | 0.697232549 | 10.1883183   | 0.000370248 |
| ensp00000254661 | ramp1      | 3779 | 0.390231309 | 3.833335484  | 0.000380896 |
| ensp00000340191 | fpr2       | 4131 | 0.426579926 | -5.257773333 | 0.000393429 |
| ensp00000364140 | col15a1    | 5711 | 0.589735646 | -3.522905925 | 0.000399961 |
| ensp00000225964 | col1a1     | 5662 | 0.584675754 | 5.696078431  | 0.000410597 |
| ensp00000261523 | rora       | 3320 | 0.34283354  | 2.038628588  | 0.00042725  |
| ensp00000263621 | elane      | 5414 | 0.559066501 | -5.04023517  | 0.00043389  |
| ensp00000226317 | cxcl6      | 4022 | 0.415324246 | 8.296319444  | 0.000444926 |
| ensp00000261007 | chrna1     | 7584 | 0.78314746  | -6.845712483 | 0.000456533 |
| ensp00000085219 | cd22       | 4952 | 0.511358943 | -9.583325    | 0.000458843 |
| ensp00000234071 | proc       | 5498 | 0.567740603 | 2.342576916  | 0.000465124 |
| ensp00000416387 | fblim1     | 5545 | 0.572593969 | 5.8275       | 0.000470826 |
| ensp00000350616 | ddc        | 7945 | 0.820425444 | -10.25757576 | 0.000484651 |
| ensp00000338072 | avpr2      | 3821 | 0.39456836  | 4.91742435   | 0.00048667  |
| ensp00000282499 | gria4      | 6747 | 0.696716233 | 4.125757862  | 0.000491604 |
| ensp00000364475 | fbp1       | 7280 | 0.751755473 | 14.2762      | 0.000508197 |
| ensp00000307046 | sdC2       | 5650 | 0.583436596 | -2.918913284 | 0.000514775 |

|                 |          |      |             |              |             |
|-----------------|----------|------|-------------|--------------|-------------|
| ensp00000297268 | col1a2   | 5661 | 0.584572491 | 4.697925758  | 0.00052293  |
| ensp00000332052 | pcsk6    | 7440 | 0.768277571 | -4.892014085 | 0.000528441 |
| ensp00000352547 | gpat2    | 7406 | 0.764766625 | 2.261837253  | 0.000529003 |
| ensp00000409605 | trim15   | 6426 | 0.663568773 | -6.174825175 | 0.000545512 |
| ensp00000403221 | trim15   | 6770 | 0.699091285 | -6.174825175 | 0.000545512 |
| ensp00000297991 | aqp3     | 5333 | 0.550702189 | -3.222395023 | 0.000548472 |
| ensp00000306884 | cxcl11   | 4087 | 0.422036349 | 8.531914894  | 0.000554234 |
| ensp00000285018 | wnt7a    | 3757 | 0.387959521 | 11.55803055  | 0.00056281  |
| ensp00000363965 | alpl     | 6312 | 0.651796778 | -2.19113986  | 0.000568676 |
| ensp00000320886 | mlxipl   | 6862 | 0.708591491 | -5.20325     | 0.000575481 |
| ensp00000227752 | il10ra   | 4641 | 0.479244114 | 7.012446893  | 0.000581354 |
| ensp00000264917 | pde8b    | 3848 | 0.397356464 | -2.947228776 | 0.000584285 |
| ensp00000320935 | slc2a4   | 3712 | 0.383312681 | -8.401746027 | 0.000588367 |
| ensp00000322390 | fgf13    | 5044 | 0.520859149 | 5.444441667  | 0.000610457 |
| ensp00000363298 | bspry    | 7345 | 0.758467575 | 13.62927006  | 0.000611927 |
| ensp00000309572 | tert     | 2947 | 0.304316398 | -2.583397779 | 0.000615036 |
| ensp00000361943 | heyl     | 3216 | 0.332094176 | 5.164573306  | 0.000631158 |
| ensp00000362570 | fndc5    | 6540 | 0.675340768 | -4.185714286 | 0.000645738 |
| ensp00000361214 | nrg3     | 9183 | 0.94826518  | 15.4         | 0.000646211 |
| ensp00000414330 | rimkla   | 6440 | 0.665014457 | 14.04055678  | 0.000648366 |
| ensp00000330330 | tmprss2  | 1514 | 0.156340355 | 2.717753535  | 0.000654348 |
| ensp00000351671 | ccl20    | 4060 | 0.419248245 | 3.086742858  | 0.000674984 |
| ensp00000343477 | runx3    | 3664 | 0.378356051 | -10.34920635 | 0.000681859 |
| ensp00000289746 | cdh15    | 4579 | 0.472841801 | -2.94631621  | 0.000711769 |
| ensp00000393847 | pla2g10  | 7579 | 0.782631144 | 4.474577788  | 0.000741751 |
| ensp00000209728 | cdc6     | 2374 | 0.245146634 | -2.776470588 | 0.000742506 |
| ensp00000340937 | col17a1  | 5697 | 0.588289963 | 2.020384539  | 0.000754216 |
| ensp00000309757 | lpl      | 5103 | 0.526951673 | 8.448644082  | 0.000758161 |
| ensp00000255082 | acy3     | 7956 | 0.821561338 | -4.985809619 | 0.000781381 |
| ensp00000259206 | il1rn    | 8756 | 0.90417183  | 3.684653968  | 0.000783651 |
| ensp00000304767 | p2ry1    | 4253 | 0.439178026 | -4.042606776 | 0.000787137 |
| ensp00000335500 | c7orf57  | 6285 | 0.649008674 | -14.03368086 | 0.000813442 |
| ensp00000302269 | vav1     | 4831 | 0.498864106 | 8.801927536  | 0.000815719 |
| ensp00000263925 | lnx1     | 6800 | 0.702189178 | 3.3358       | 0.000822816 |
| ensp00000339398 | hla-dqa1 | 5722 | 0.590871541 | -3.501084967 | 0.000827537 |
| ensp00000414360 | hla-dqa1 | 6523 | 0.673585295 | -3.501084967 | 0.000827537 |
| ensp00000387892 | hla-dqa1 | 8745 | 0.903035936 | -3.501084967 | 0.000827537 |
| ensp00000409127 | hla-dqa1 | 8746 | 0.903139199 | -3.501084967 | 0.000827537 |
| ensp00000372738 | hla-dqa1 | 8885 | 0.917492772 | -3.501084967 | 0.000827537 |
| ensp00000312326 | aoc3     | 7885 | 0.814229657 | -2.213190813 | 0.000828752 |
| ensp00000363081 | dkk1     | 3735 | 0.385687732 | 3.318771845  | 0.000834814 |
| ensp00000307694 | kcns1    | 8449 | 0.872470054 | 6.552775     | 0.000842488 |
| ensp00000005180 | ccl26    | 4080 | 0.421313507 | -2.561272059 | 0.000860035 |
| ensp00000357013 | cd244    | 5995 | 0.619062371 | 6.458066801  | 0.000863736 |
| ensp00000417229 | eif2a    | 1283 | 0.132486576 | -2.491023563 | 0.000868779 |
| ensp00000359478 | abcc2    | 411  | 0.04244114  | -2.10425179  | 0.00088582  |
| ensp00000295156 | vsnl1    | 8115 | 0.837980173 | -2.48561279  | 0.000892839 |



|                 |           |      |             |              |             |
|-----------------|-----------|------|-------------|--------------|-------------|
| ensp00000368401 | pax6      | 6292 | 0.649731516 | 4.61732852   | 0.000900372 |
| ensp00000161559 | ceacam1   | 8612 | 0.889301941 | 2.807851737  | 0.00093237  |
| ensp00000301908 | pnoc      | 4009 | 0.413981826 | 9.244701324  | 0.000949483 |
| ensp00000233809 | igfbp2    | 5745 | 0.593246592 | 3.665697674  | 0.000958719 |
| ensp00000155840 | kcnq1     | 8273 | 0.854295746 | 6.639047553  | 0.000960882 |
| ensp00000311997 | nefh      | 5803 | 0.599235853 | 3.680234867  | 0.000985835 |
| ensp00000357753 | ivl       | 3908 | 0.403552251 | 4.828663551  | 0.000988758 |
| ensp00000355370 | cntf      | 4610 | 0.476042957 | -2.140802817 | 0.000990514 |
| ensp00000302707 | fpr1      | 4013 | 0.414394878 | -4.429771308 | 0.000999422 |
| ensp00000200307 | ccl7      | 4077 | 0.421003717 | 4.380001752  | 0.00100403  |
| ensp00000337383 | nlrp3     | 2741 | 0.283044197 | 13.19746997  | 0.00102865  |
| ensp00000275815 | epha1     | 4813 | 0.49700537  | 6.686746988  | 0.00103728  |
| ensp00000381876 | daam2     | 3597 | 0.371437423 | -2.38965928  | 0.00106433  |
| ensp00000264012 | cdh3      | 3799 | 0.392296572 | 9.965714384  | 0.00107132  |
| ensp00000360181 | sh2d1a    | 6174 | 0.637546468 | 4.188782749  | 0.00108245  |
| ensp00000292596 | ltc4s     | 7648 | 0.789756299 | 3.639490643  | 0.00108253  |
| ensp00000265643 | gal       | 4036 | 0.41676993  | 3.235426017  | 0.00108592  |
| ensp00000357153 | cd1d      | 6277 | 0.648182569 | 3.054218707  | 0.00110678  |
| ensp00000385149 | neu4      | 8139 | 0.840458488 | -4.995047027 | 0.00112194  |
| ensp00000217407 | lbp       | 4368 | 0.451053284 | -3.031703216 | 0.00116372  |
| ensp00000276925 | cdkn2b    | 2759 | 0.284902933 | 4.549023529  | 0.00116468  |
| ensp00000262752 | rps6ka6   | 4454 | 0.459933912 | 6.018513889  | 0.00118815  |
| ensp00000298841 | serpina4  | 9340 | 0.964477489 | -3.019191895 | 0.00119611  |
| ensp00000367714 | hes5      | 3276 | 0.338289963 | 13.04053643  | 0.00122215  |
| ensp00000363985 | mtmr8     | 9114 | 0.941140025 | 3.568707469  | 0.00122751  |
| ensp00000384264 | cnga1     | 3898 | 0.40251962  | 5.824324324  | 0.00123806  |
| ensp00000268933 | epn3      | 4975 | 0.513733994 | 4.101400035  | 0.00123978  |
| ensp00000259455 | gabbr2    | 4239 | 0.437732342 | 12.87340957  | 0.00124122  |
| ensp00000299339 | cldn10    | 6957 | 0.718401487 | 13.19885046  | 0.00124638  |
| ensp00000304408 | col3a1    | 5660 | 0.584469228 | 20.2999394   | 0.00125116  |
| ensp00000275016 | cyp39a1   | 7815 | 0.807001239 | 2.864525369  | 0.00126559  |
| ensp00000354478 | dlx1      | 1325 | 0.136823627 | 2.394528279  | 0.00134141  |
| ensp00000312837 | rab11fip4 | 7504 | 0.774886411 | 3.116567663  | 0.00137797  |
| ensp00000374372 | sptb      | 4741 | 0.489570425 | 2.572969041  | 0.00141025  |
| ensp00000310244 | rasgrp1   | 5067 | 0.523234201 | 7.773282499  | 0.00141894  |
| ensp00000263413 | c6        | 2525 | 0.260739364 | -9.658811965 | 0.00142211  |
| ensp00000356905 | vnn1      | 8380 | 0.865344899 | 4.504672897  | 0.0014259   |
| ensp00000356991 | pvr14     | 5595 | 0.577757125 | 5.414354167  | 0.00145337  |
| ensp00000221700 | cyp4f2    | 7618 | 0.786658406 | -6.302907632 | 0.00147472  |
| ensp00000359892 | slc44a5   | 4804 | 0.496076002 | 9.165067151  | 0.00150483  |
| ensp00000289429 | cd1a      | 7337 | 0.75764147  | 3.252790612  | 0.00162062  |
| ensp00000384169 | fbln2     | 5947 | 0.614105741 | 2.176953881  | 0.00162401  |
| ensp00000367059 | espn      | 6547 | 0.67606361  | -2.567453911 | 0.00162452  |
| ensp00000360806 | kcnb1     | 8389 | 0.866274267 | -4.605405405 | 0.00164498  |
| ensp00000260187 | usp2      | 2982 | 0.307930607 | -2.331424765 | 0.00166925  |
| ensp00000337731 | cideb     | 4153 | 0.428851714 | -2.44824173  | 0.00167489  |
| ensp00000216115 | bik       | 3463 | 0.357600165 | 2.402587875  | 0.00169197  |

|                 |          |      |             |              |            |
|-----------------|----------|------|-------------|--------------|------------|
| ensp00000255266 | pde6a    | 2725 | 0.281391987 | -9.552795309 | 0.00169751 |
| ensp00000201031 | tfap2c   | 335  | 0.034593143 | -3.179699588 | 0.00178998 |
| ensp00000355245 | pax9     | 625  | 0.064539447 | -2.438453981 | 0.00182432 |
| ensp00000353198 | pyy      | 3951 | 0.407992565 | 7.587172098  | 0.00182649 |
| ensp00000297404 | kcnv1    | 8472 | 0.874845105 | -4.516933898 | 0.0018502  |
| ensp00000319814 | pck1     | 3713 | 0.383415944 | -9.602272727 | 0.00187759 |
| ensp00000336591 | ppp2r2b  | 3264 | 0.337050805 | 3.079187765  | 0.0018851  |
| ensp00000291670 | ftcd     | 8260 | 0.852953325 | 5.157452354  | 0.00188577 |
| ensp00000410321 | ly6g5c   | 6509 | 0.672139612 | -2.493239874 | 0.00188894 |
| ensp00000386209 | or2a2    | 9556 | 0.986782321 | 3.924814981  | 0.00195691 |
| ensp00000304004 | foxa3    | 5485 | 0.566398183 | 2.061748587  | 0.00207326 |
| ensp00000369858 | alox5ap  | 7647 | 0.789653036 | 2.104338927  | 0.0021103  |
| ensp00000265728 | dbf4     | 2326 | 0.240190004 | -3.600010141 | 0.00220018 |
| ensp00000305424 | or1f1    | 9666 | 0.998141264 | -4.536315901 | 0.00223536 |
| ensp00000408617 | hdac9    | 2967 | 0.30638166  | 8.927854565  | 0.00225298 |
| ensp00000305603 | fut3     | 9242 | 0.954357703 | 8.874999598  | 0.00226943 |
| ensp00000261233 | irak3    | 4345 | 0.448678232 | 9.993945455  | 0.00236812 |
| ensp00000358092 | prdm1    | 1754 | 0.181123503 | 2.363633481  | 0.00237627 |
| ensp00000333122 | nr4a3    | 8987 | 0.928025609 | 2.727139021  | 0.00238737 |
| ensp00000249016 | mchr1    | 4104 | 0.423791822 | 9.072081081  | 0.00242392 |
| ensp00000299333 | scn3b    | 286  | 0.029533251 | 10.4367931   | 0.00245294 |
| ensp00000222792 | chn2     | 7872 | 0.812887237 | 5.144111417  | 0.00245543 |
| ensp00000305355 | prkcb    | 5216 | 0.538620405 | -3.356397188 | 0.00245884 |
| ensp00000278187 | gas2     | 6702 | 0.692069393 | -2.803355237 | 0.00256702 |
| ensp00000345512 | sema6a   | 6293 | 0.649834779 | 3.874014223  | 0.00260485 |
| ensp00000372160 | dok6     | 4726 | 0.488021479 | 9.144177142  | 0.00268846 |
| ensp00000346160 | dusp19   | 7537 | 0.778294093 | -3.375857457 | 0.00269066 |
| ensp00000277120 | ntrk2    | 4614 | 0.47645601  | 2.418577414  | 0.0027134  |
| ensp00000290341 | igf2bp1  | 1945 | 0.200846758 | 2.035827103  | 0.00274454 |
| ensp00000356898 | ddr2     | 7680 | 0.793060719 | 2.821721945  | 0.00277948 |
| ensp00000360762 | ankrd1   | 3587 | 0.370404791 | 8.733342857  | 0.00279899 |
| ensp00000336829 | fgg      | 5421 | 0.559789343 | -5.823418529 | 0.00306269 |
| ensp00000358301 | adrb1    | 3819 | 0.394361834 | 5.547012821  | 0.00311097 |
| ensp00000328181 | nog      | 5890 | 0.608219744 | 2.929650665  | 0.00321233 |
| ensp00000245479 | sox9     | 1758 | 0.181536555 | 4.328553036  | 0.00326749 |
| ensp00000349595 | atp2a1   | 6095 | 0.629388682 | -3.268860162 | 0.00326965 |
| ensp00000377303 | renbp    | 8856 | 0.914498141 | 4.088888889  | 0.00330581 |
| ensp00000307875 | b3gat1   | 6178 | 0.637959521 | 12.15237143  | 0.00332778 |
| ensp00000233954 | il1rl1   | 7414 | 0.76559273  | 12.02151613  | 0.0033761  |
| ensp00000410443 | hla-dra  | 5721 | 0.590768278 | -3.314692788 | 0.003499   |
| ensp00000372608 | hla-dra  | 5724 | 0.591078067 | -3.314692788 | 0.003499   |
| ensp00000372746 | hla-dra  | 6381 | 0.658921933 | -3.314692788 | 0.003499   |
| ensp00000402951 | hla-dra  | 6501 | 0.671313507 | -3.314692788 | 0.003499   |
| ensp00000405295 | hla-dra  | 9175 | 0.947439075 | -3.314692788 | 0.003499   |
| ensp00000257549 | sds      | 8150 | 0.841594382 | -2.125836443 | 0.00350846 |
| ensp00000420716 | c1orf228 | 6898 | 0.712308963 | 2.22689618   | 0.00354317 |
| ensp00000327251 | nos2     | 5053 | 0.521788517 | 2.065224055  | 0.00357044 |

|                 |          |      |             |              |            |
|-----------------|----------|------|-------------|--------------|------------|
| ensp00000225245 | ccl3     | 4075 | 0.420797191 | 5.107692308  | 0.00369454 |
| ensp00000261374 | hs3st2   | 6068 | 0.626600578 | 2.904637342  | 0.00370175 |
| ensp00000285393 | atp6v0d2 | 8558 | 0.883725733 | 3.093306394  | 0.00373616 |
| ensp00000354677 | gpx7     | 6651 | 0.686802974 | 7.303577608  | 0.00374474 |
| ensp00000263923 | kdr      | 4692 | 0.484510533 | -2.500995051 | 0.00378614 |
| ensp00000225474 | csf3     | 7114 | 0.734613796 | 8.292403509  | 0.0038637  |
| ensp00000305464 | apln     | 4035 | 0.416666667 | 2.484323143  | 0.00386891 |
| ensp00000216274 | ripk3    | 4326 | 0.446716233 | 6.324013986  | 0.00393956 |
| ensp00000328968 | scn5a    | 3606 | 0.372366791 | 3.240819085  | 0.0039674  |
| ensp00000252945 | cyp2e1   | 7749 | 0.800185874 | 6.293701893  | 0.00402717 |
| ensp00000263686 | selp     | 6078 | 0.627633209 | 5.984783891  | 0.00432483 |
| ensp00000357905 | dmbt1    | 264  | 0.027261462 | -2.631569391 | 0.00435826 |
| ensp00000331504 | fes      | 4659 | 0.48110285  | 8.823301194  | 0.0043813  |
| ensp00000387230 | upp2     | 2684 | 0.277158199 | -4.242184186 | 0.00440393 |
| ensp00000363680 | eda      | 114  | 0.011771995 | 4.956952008  | 0.00448789 |
| ensp00000339992 | myb      | 3487 | 0.36007848  | -2.274347367 | 0.0045276  |
| ensp00000304930 | sostdc1  | 5873 | 0.606464271 | -3.527680269 | 0.00461872 |
| ensp00000255380 | chrn3    | 4187 | 0.43236266  | 2.564606309  | 0.00464241 |
| ensp00000375069 | col23a1  | 5712 | 0.58983891  | -2.449072917 | 0.00464399 |
| ensp00000378577 | cldn3    | 6953 | 0.717988435 | 8.244995612  | 0.00469634 |
| ensp00000263816 | lrp2     | 5830 | 0.602023957 | -4.817455279 | 0.00485124 |
| ensp00000256722 | cmpk2    | 2634 | 0.271995043 | 4.182967696  | 0.00497197 |
| ensp00000328674 | cldn6    | 6942 | 0.71685254  | 6.59372627   | 0.00497697 |
| ensp00000312506 | cspg4    | 6090 | 0.628872367 | 3.764424887  | 0.00498414 |
| ensp00000295408 | mertk    | 5599 | 0.578170178 | 2.432624113  | 0.00503116 |
| ensp00000219150 | coro1a   | 5921 | 0.6114209   | 2.073547573  | 0.00505603 |
| ensp00000327107 | pdzd3    | 532  | 0.054935977 | -2.835643912 | 0.00506406 |
| ensp00000372170 | msx1     | 1690 | 0.174514663 | -2.068887121 | 0.00525792 |
| ensp00000354416 | ccl28    | 3984 | 0.411400248 | 3.699994906  | 0.0053093  |
| ensp00000360561 | entpd8   | 2616 | 0.270136307 | -5.036453125 | 0.00537546 |
| ensp00000379204 | bmp7     | 5815 | 0.60047501  | 12.17046838  | 0.00538245 |
| ensp00000259365 | tmod1    | 5808 | 0.599752169 | 3.627913467  | 0.00552092 |
| ensp00000262441 | glp2r    | 3845 | 0.397046675 | -2.45807227  | 0.00552915 |
| ensp00000350256 | ccr9     | 4030 | 0.416150351 | 10.68828482  | 0.00553522 |
| ensp00000284562 | gsta5    | 7807 | 0.806175134 | -3.655113861 | 0.00556951 |
| ensp00000393379 | kif5c    | 6160 | 0.636100785 | 3.418813132  | 0.00557111 |
| ensp00000349490 | mfng     | 3315 | 0.342317224 | -2.21000321  | 0.00565854 |
| ensp00000240617 | plbd1    | 7480 | 0.772408096 | 5.751281095  | 0.00597988 |
| ensp00000288139 | cacna1d  | 5174 | 0.534283354 | -2.900814747 | 0.00603223 |
| ensp00000369003 | trpc4    | 5124 | 0.529120198 | 2.297961833  | 0.00609968 |
| ensp00000379895 | gatm     | 8049 | 0.831164808 | 3.683649682  | 0.00618313 |
| ensp00000340396 | gbp5     | 6568 | 0.678232135 | 3.555827924  | 0.00633805 |
| ensp00000296029 | pf4      | 4336 | 0.447748864 | 3.115830116  | 0.00639547 |
| ensp00000355718 | dll1     | 3480 | 0.359355638 | 4.486208798  | 0.0065011  |
| ensp00000369323 | npnt     | 6080 | 0.627839736 | 5.242091045  | 0.00652353 |
| ensp00000296028 | ppbp     | 4200 | 0.433705081 | 5.014992493  | 0.00658458 |
| ensp00000301061 | wnt10b   | 3572 | 0.368855845 | -3.650203704 | 0.0068929  |

|                 |          |      |             |              |            |
|-----------------|----------|------|-------------|--------------|------------|
| ensp00000360020 | diras3   | 1487 | 0.153552251 | 3.898676697  | 0.00737116 |
| ensp00000368253 | nr0b1    | 3311 | 0.341904172 | -2.192654692 | 0.00753756 |
| ensp00000369531 | ubqlnl   | 1520 | 0.156959934 | -2.663072706 | 0.00764914 |
| ensp00000356671 | serpinc1 | 5519 | 0.569909128 | -2.263686567 | 0.00765692 |
| ensp00000078445 | creb3l3  | 3889 | 0.401590252 | -7.92148433  | 0.0076583  |
| ensp00000239243 | msx2     | 1241 | 0.128149525 | -2.961089334 | 0.00776777 |
| ensp00000257572 | hrk      | 3443 | 0.355534903 | 2.695003652  | 0.00785935 |
| ensp00000335657 | cck      | 4164 | 0.429987608 | 4.532377361  | 0.0078705  |
| ensp00000225275 | mpo      | 4624 | 0.477488641 | 2.951349756  | 0.00787797 |
| ensp00000265459 | nrxn2    | 8395 | 0.866893846 | -3.358123967 | 0.00813586 |
| ensp00000358896 | as3mt    | 8218 | 0.848616274 | 7.953492996  | 0.00814644 |
| ensp00000282096 | pde3b    | 2717 | 0.280565882 | 13.55697919  | 0.00819945 |
| ensp00000369497 | brca2    | 2217 | 0.228934325 | -3.768656716 | 0.00823625 |
| ensp00000357927 | bnipl    | 6357 | 0.656443618 | -2.560306397 | 0.00836968 |
| ensp00000264839 | rims1    | 6991 | 0.721912433 | 2.487001666  | 0.0085401  |
| ensp00000361813 | bex1     | 4417 | 0.456113176 | 2.205605867  | 0.00856805 |
| ensp00000312185 | elmo1    | 4872 | 0.503097893 | 6.303793479  | 0.00862253 |
| ensp00000414598 | mrvi1    | 3621 | 0.373915737 | -3.42020658  | 0.0087332  |
| ensp00000345229 | dner     | 3444 | 0.355638166 | -3.341556939 | 0.00884802 |
| ensp00000262345 | il12rb2  | 4529 | 0.467678645 | 4.023335345  | 0.00892369 |
| ensp00000295731 | ihh      | 5853 | 0.604399009 | -3.90560177  | 0.00903458 |
| ensp00000371372 | atp12a   | 8656 | 0.893845518 | 4.779662637  | 0.00927954 |
| ensp00000379154 | rasgef1a | 6382 | 0.659025196 | 4.102567308  | 0.00929213 |
| ensp00000317214 | capn6    | 2581 | 0.266522098 | 2.039216912  | 0.00935106 |
| ensp00000260598 | khk      | 7322 | 0.756092524 | -4.606557377 | 0.00940445 |
| ensp00000354609 | cnksr1   | 5122 | 0.528913672 | 2.561688312  | 0.00973041 |
