# Supplementary material for: Transcriptome analysis reveals manifold mechanisms of cyst development in ADPKD
Source: PubMed Central journal article supplement (PMC5117508; doi:10.1186/s40246-016-0095-x), 2016-11-21
Supplement: 40246_2016_95_MOESM3_ESM.pdf [file 40246_2016_95_MOESM3_ESM.pdf]

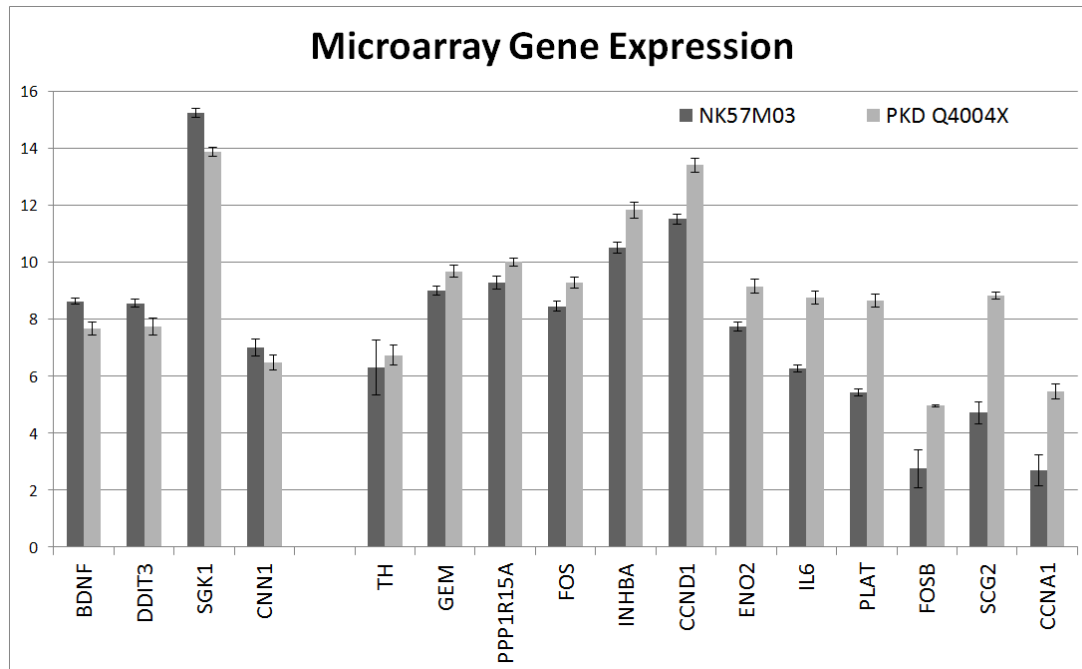

| PCR Gene Expression |       |          |
|---------------------|-------|----------|
| BDNF                | -6.29 | 0.008558 |
| DDIT3               | -1.94 | 0.001954 |
| SGK1                | -2.49 | 0.019200 |
| CNN1                | -2.32 | 0.012049 |
|                     |       |          |
| GEM                 | 1.85  | 0.009975 |
| PPP1R15A            | 2.71  | 0.002131 |
| FOS                 | 8.50  | 0.000123 |
| INHBA               | 10.95 | 0.000026 |
| CCND1               | 42.40 | 0.000123 |
| ENO2                | 4.46  | 0.001085 |
| IL6                 | 18.63 | 0.000033 |
| PLAT                | 29.98 | 0.003126 |
| FOSB                | 10.82 | 0.001328 |
| SCG2                | 47.11 | 0.000044 |
| CCNA1               | 7.48  | 0.004563 |

**Additional File 3. Microarray Validation by PCR.** A sampling of microarray data was validated using PCR. Trends in up or down regulation of expression were preserved.
